# Supplementary material for: An eco-friendly approach using a nonfluorous self-cleaning metal–organic framework composite and membrane for oil–water separation
Source: Royal Society of Chemistry journal article supplement (doi:10.1039/d2qi02062a), 2022-11-15
Supplement: d2qi02062a2.pdf [file d2qi02062a2.pdf]

## Supporting Information For:

### **An eco-friendly approach by nonfluorous self-cleaning metal-organic framework composite and membrane for oil-water separation**

*Abhijeet Rana, Subhrajyoti Ghosh, and Shyam Biswas\**

Department of Chemistry, Indian Institute of Technology Guwahati, Guwahati, 781039 Assam, India.

\* Corresponding author. Tel: 91-3612583309, Fax: 91-3612582349.

E-mail address: sbiswas@iitg.ac.in

## Materials and General Methods:

All the reagents and solvents were purchased from commercial sources and used without further purification, except the 2-palmitamidoterephthalic acid (H<sub>2</sub>BDC-NH-R) linker which was prepared according to the following procedure given below and the purity of the newly synthesized compound was examined by <sup>1</sup>H NMR, <sup>13</sup>C NMR, ATR-IR and mass spectrometric analysis (Fig. S1-S4). The melamine sponge and silk sheet were purchased from Amazon India. The Attenuated Total Reflectance Infrared (ATR-IR) spectra were recorded using PerkinElmer UATR Two at the ambient condition in the region 400-4000 cm<sup>-1</sup>. The notations used for characterization of the bands are broad (br), strong (s), very strong (vs), medium (m), weak (w) and shoulder (sh). Thermogravimetric analysis (TGA) was carried out with a PerkinElmer TGA 4000 thermal analyzer in the temperature range of 30-700 °C under N<sub>2</sub> atmosphere at the rate of 4 °C min<sup>-1</sup>. Powder X-ray diffraction (PXRD) instrument Rigaku Smartlab X-ray diffractometer (model: TTRAX III) with Cu-Kα radiation (λ = 1.54056 Å), 50 kV of operating voltage and 100 mA of operating current was used for the collection of all PXRD data. N<sub>2</sub> sorption isotherms were recorded by using Quantachrome Quadrasorb Evo volumetric gas adsorption equipment at -196 °C. Before the sorption analysis, the degassing of the compound was carried out at 120 °C under a high vacuum for 12 h. FE-SEM images were collected with a Zeiss (Sigma 300) scanning electron microscope. Gemini 500 was utilized for Energy Dispersive X-rays spectrometer (EDX) for elemental characterization. Pawley refinement was carried out using Materials Studio software. The DICVOL program incorporated within STOE's WinXPow software package was used to determine the lattice parameters. The contact angle measurements were performed by employing a Hol-marc HO-IOD-CAN-018 equipment at ambient temperature.

## Synthesis of H<sub>2</sub>BDC-NH-R:

The organic linker was synthesized using tetrahydrofuran (THF) as a solvent and pyridine as a base. 1 g (5.52 mmol) of 2-amino benzene-1,4-dicarboxylic acid and 1.75 mL (5.52 mmol) of palmitoyl chloride were taken in a round bottom flask containing 3.5 equivalents of pyridine. The mixture was refluxed for 24 h and then THF was evaporated. The resulting white powder was washed thoroughly with slightly acidic water to remove the excess pyridine. Further, it was washed with chloroform to remove any unreacted palmitoyl chloride to obtain the pure product. The <sup>1</sup>H NMR and <sup>13</sup>C NMR spectra are given below as Figure S1 and S2.

## Measurement of Absorption Capacities for Various Oils by SH-UiO-66'@sponge Composite:

For the absorption of various heavy and light oils, fully dry pre-weighed (~250-300 mg) SH-UiO-66'@sponge composite was placed in various heavy oils (CHCl<sub>3</sub>, CH<sub>2</sub>Cl<sub>2</sub> and CCl<sub>4</sub>) and light oils (hexane, ethyl acetate, petrol, diesel, crude oil, toluene, cyclohexane and kerosene). The composites were kept in oil for 1 min to reach absorption equilibrium and then removed and weighed. All the experiments were performed at room temperature. Absorption capacities for various oils were calculated using the following formula:

$$\text{Absorption capacity (g/g)} = (W_f - W_i) / W_i$$

where  $W_i$  is the initial weight of **SH-UiO-66'@sponge** and  $W_f$  is the weight of oil-absorbed **SH-UiO-66'@sponge**. Five measurements were performed for each oil sample and the average value was plotted.

#### **Absorption-Based Separation of Oil and Water by SH-UiO-66'@sponge Composite:**

A single piece of dry pre-weighed **SH-UiO-66'@sponge** composite (~250-300 mg) was placed in several oil/water combinations containing 3 mL of oil and 20 mL of water to separate the light oils (hexane, EtOAc, toluene, motor oil, gasoline and kerosene) from the surface of the water. For heavy oils ( $\text{CH}_2\text{Cl}_2$ ,  $\text{CHCl}_3$  and  $\text{CCl}_4$ ), a piece of **SH-UiO-66'@sponge** composite was brought into contact with the sediment oil for the separation of heavy oils from the oil/water combination from the bottom of the water. For each case, the **SH-UiO-66'@sponge** composite selectively soaked the oils when it came into contact and the separated oil was recovered by physically squeezing the material. All the tests were performed at room temperature. Separation efficiency (%) for various oils was calculated using the following formula:

$$\text{Separation efficiency (\%)} = V_f/V_i \times 100\%$$

where  $V_i$  was the amount of oil used (mL) and  $V_f$  was the absorbed volume of water (mL). Five measurements were performed for each oil sample and the average value was plotted.

#### **Filtration-based separation of oils from the oil-water mixture by SH-UiO-66'@silk Membrane:**

To separate different oils using the filtration-based method of separation, a round shaped piece of **SH-UiO-66'@silk** was bound with a round shaped solid circle and a mixture of different oils and water was allowed to pass through the membrane. The time needed for each step of the separation process was noted for each water-oil mixtures.

Separation efficiency (%) for various oil-water mixtures was calculated using the following formula:

$$\text{Separation efficiency (\%)} = V_f/V_i \times 100\%$$

where  $V_i$  was the amount of oil used (mL) and  $V_f$  was the obtained volume of oil (mL) after the separation experiment.

The fluxes for the oil-water separation were determined using the formula:  $\text{Flux} = V/A \times T$  (where  $V$  = volume of separated oil,  $A$  = area of the membrane and  $T$  = time required for the separation of oil from the oil-water mixture).

#### **Separation of Emulsions Using SH-UiO-66'@silk Membrane:**

All the water-in-oil emulsions were prepared (water/ $\text{CHCl}_3$ , water/toluene, water/ kerosene and water/gasoline) by sonicating the water-oil mixtures for 60 min. To make the emulsion stable, 50  $\mu\text{L}$  of surfactant (Triton X-100) was added to the oil-water mixture before sonication. Then, 4 mL (3.5 mL of oils + 0.5 mL of water) of different water-in-oil emulsions were allowed to

pass through the **SH-UiO-66'@silk** membrane. The time required for all the separation processes were recorded.

Separation efficiency (%) for various water-in-oil emulsion were calculated using the following formula:

$$\text{Separation efficiency (\%)} = V_f/V_i \times 100\%$$

where  $V_i$  was the amount of oil used (mL) for the preparation of the water in oil emulsion and  $V_f$  was the obtained volume of oil (mL) after the separation experiment.

The flux for various emulsions was calculated using a similar way (used in case of oil-water separation): Flux =  $V/A \times T$  (where  $V$  = volume of separated oil,  $A$  = area of the membrane and  $T$  = time required for the separation of oil from water-in-oil emulsion).

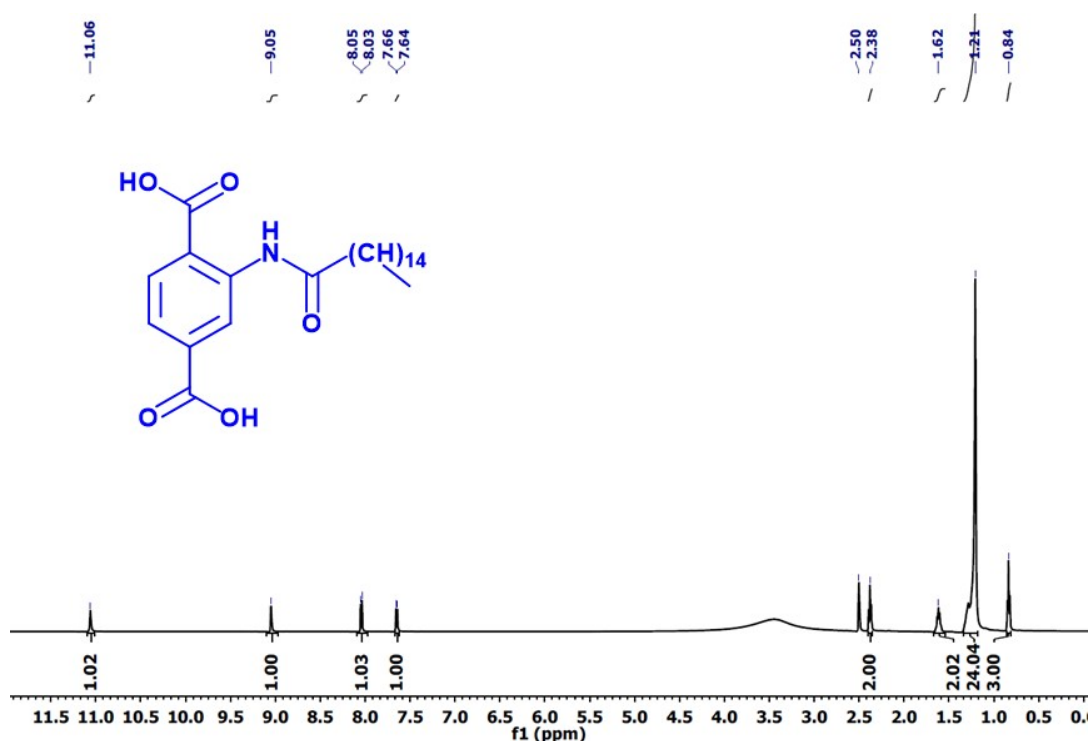

**Fig. S1.** <sup>1</sup>H NMR spectrum of H<sub>2</sub>BDC-NH-R in DMSO-d<sub>6</sub>.

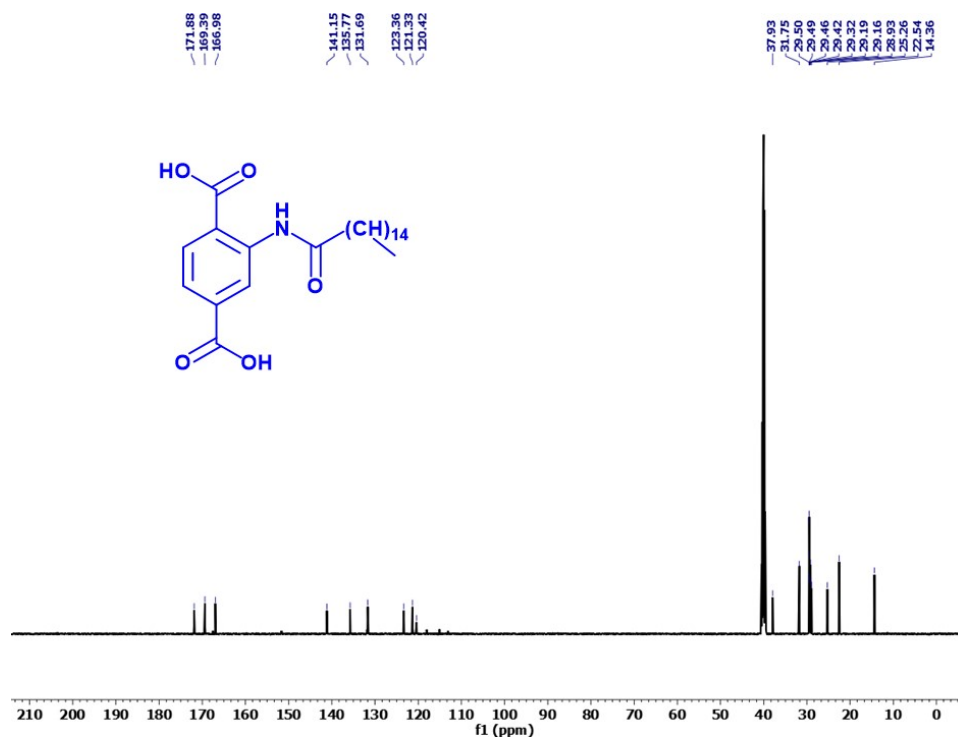

**Fig. S2.**  $^{13}C$  NMR spectrum of  $H_2BDC-NH-R$  in  $DMSO-d_6$ .

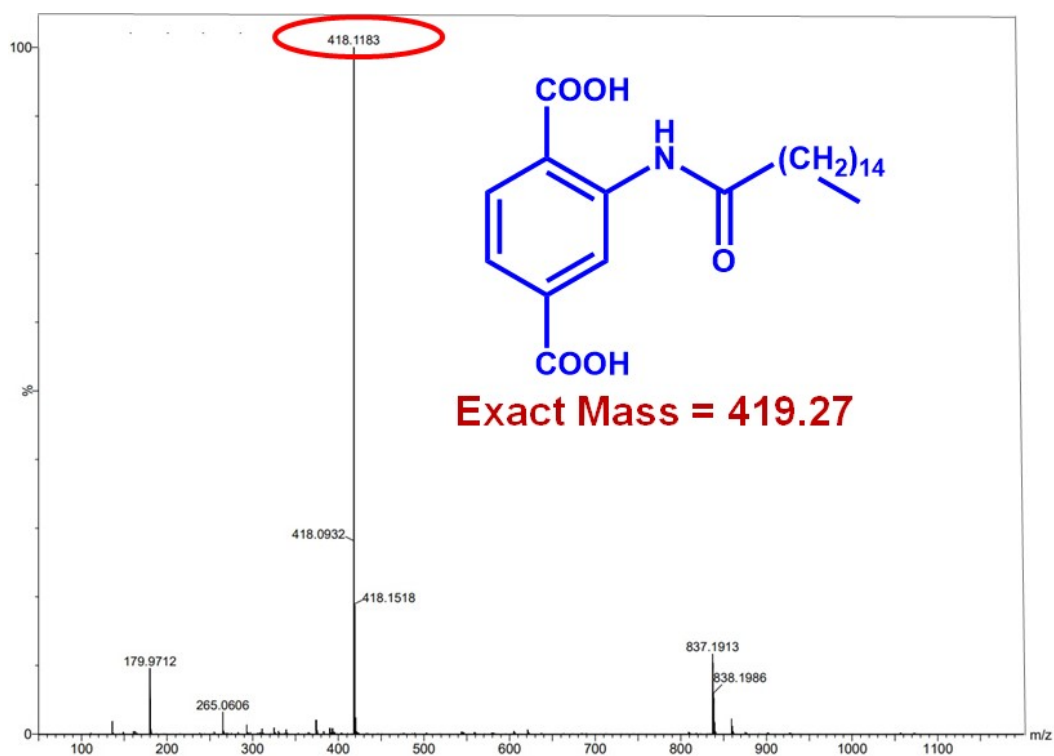

**Fig. S3.** ESI-MS spectrum of  $H_2BDC-NH-R$  measured in methanol. The spectrum shows  $m/z$  peak at 418.1183, which corresponds to  $(M-H)^-$  ion ( $M$  = mass of  $H_2BDC-NH-R$  linker).

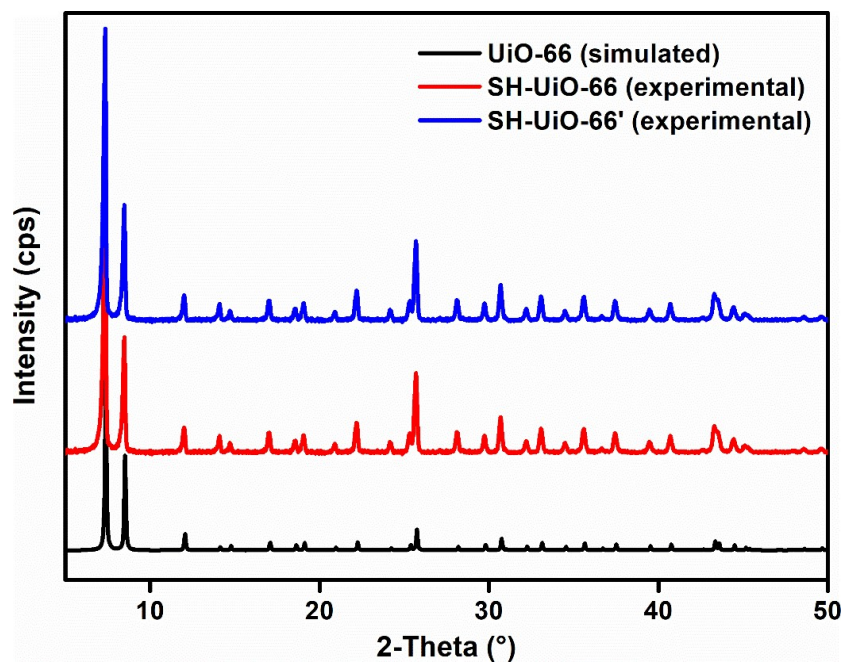

Fig. S4. PXRD patterns of (a) Zr-UiO-66 (simulated), (b) SH-UiO-66 and (c) SH-UiO-66'.

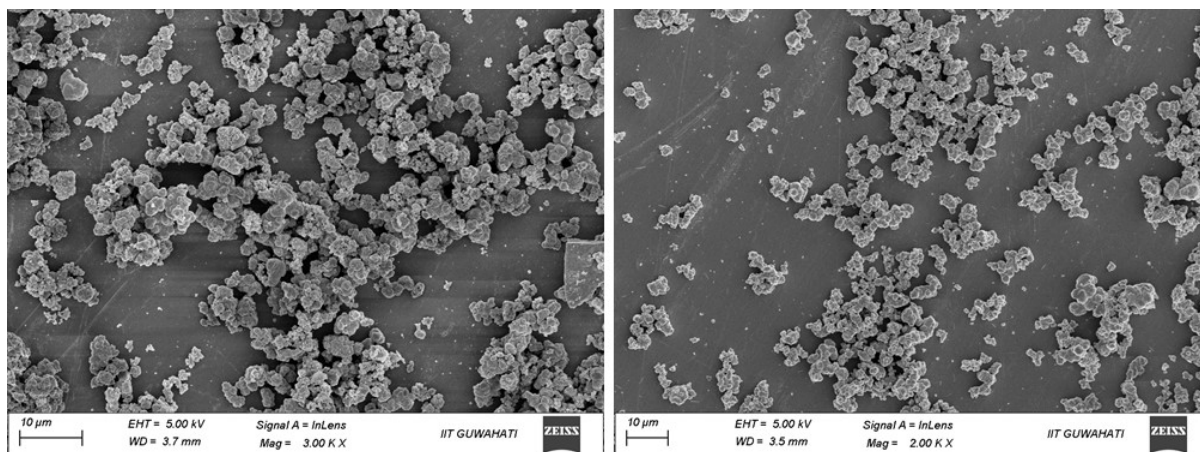

Fig. S5. FE-SEM images of SH-UiO-66.

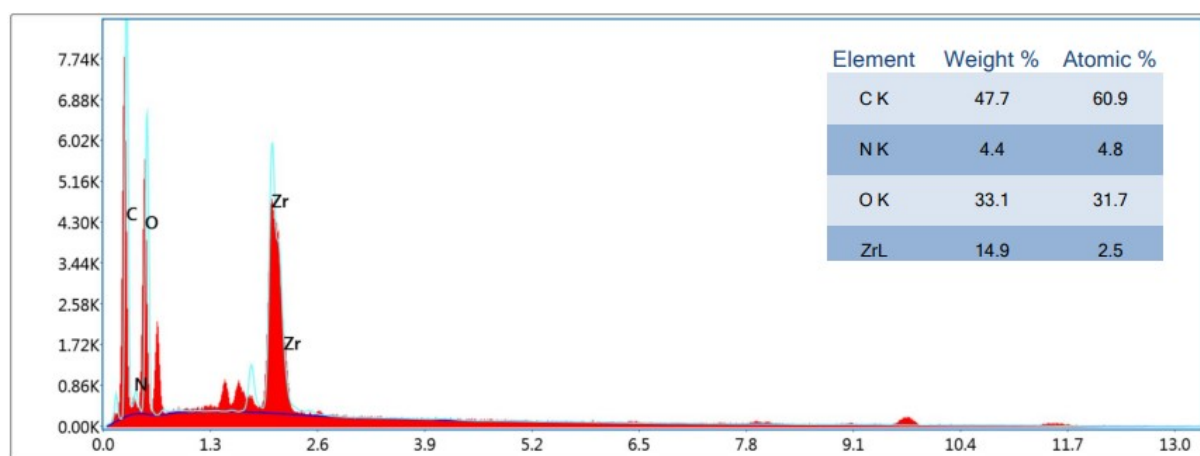

Fig. S6. EDX spectrum of SH-UiO-66.

**Table S1.** Unit cell parameters of **SH-UiO-66** obtained by indexing its PXRD data. The obtained values have been compared with parent UiO-66 MOF.

| Compound Name       | <b>SH-UiO-66</b> | UiO-66    |
|---------------------|------------------|-----------|
| Crystal System      | cubic            | cubic     |
| a = b = c (Å)       | 20.753 (4)       | 20.790(3) |
| V (Å <sup>3</sup> ) | 8938.3 (29)      | 8985.9(9) |

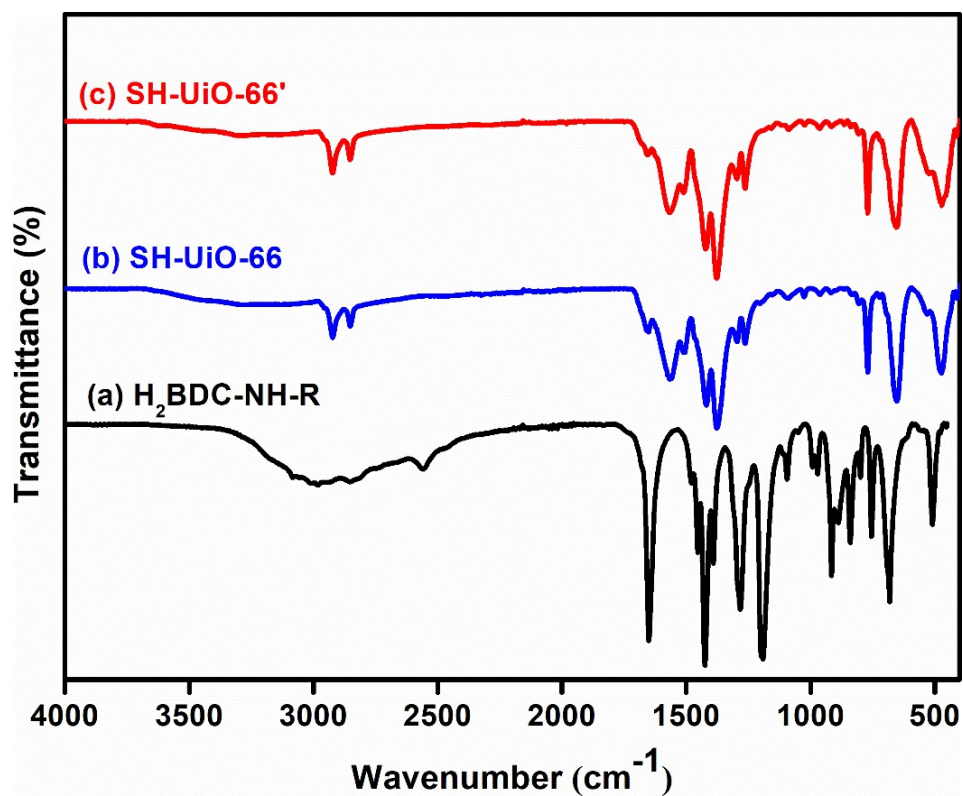

**Fig. S7.** ATR-IR spectra of (a) H<sub>2</sub>BDC-NH-R linker, (b) **SH-UiO-66** and (c) **SH-UiO-66'**.



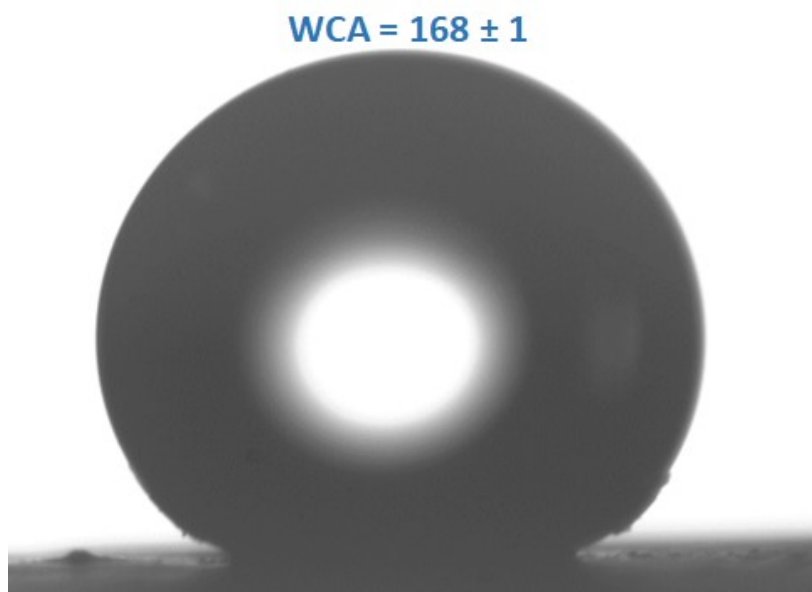

**Fig. S8.** Water contact angle (WCA) measurement image of SH-UiO-66'.

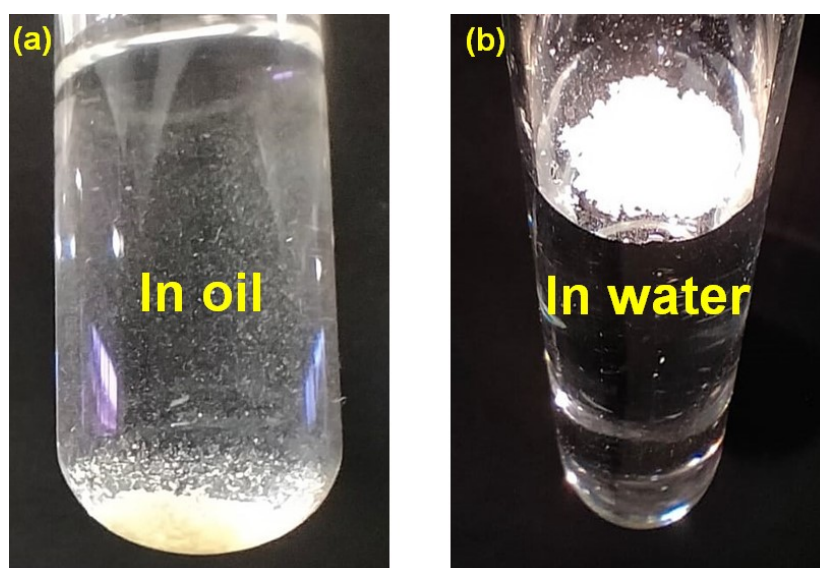

**Fig. S9.** Self-floating ability of SH-UiO-66' in water (a) and oil (hexane) (b).



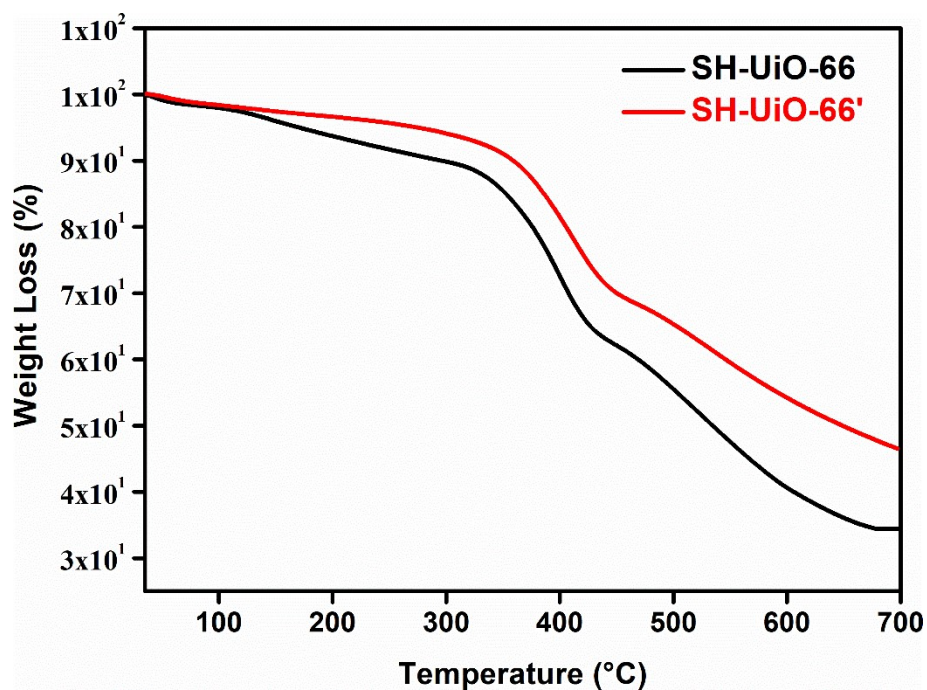

**Fig. S10.** TGA curves of as-synthesized SH-UiO-66 (black) and activated SH-UiO-66' (red) recorded in N<sub>2</sub> atmosphere in temperature range of 30-700 °C at a heating rate of 4 °C min<sup>-1</sup>.

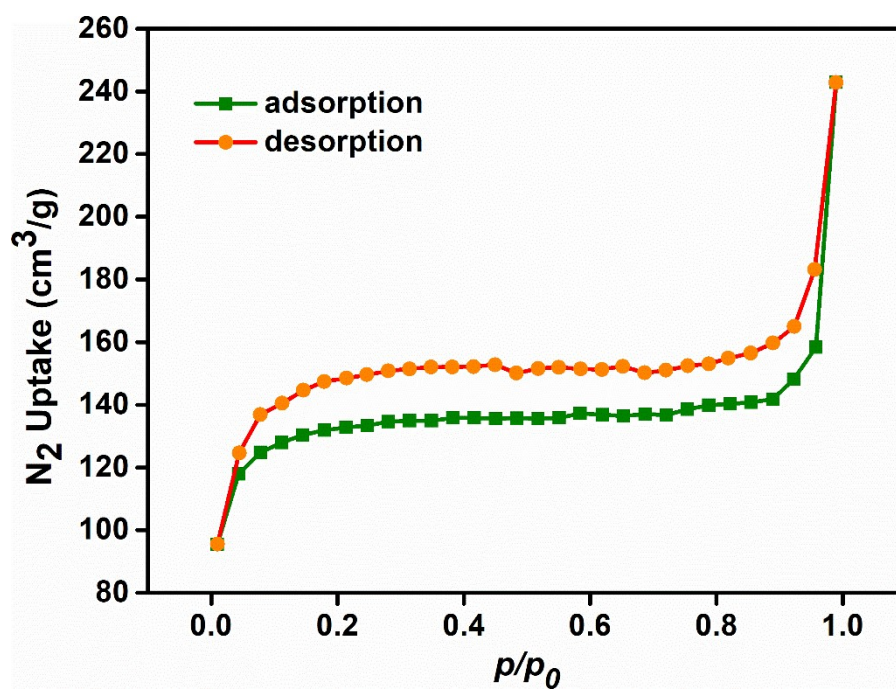

**Fig. S11.** Nitrogen adsorption and desorption isotherms of SH-UiO-66' recorded at -196 °C.

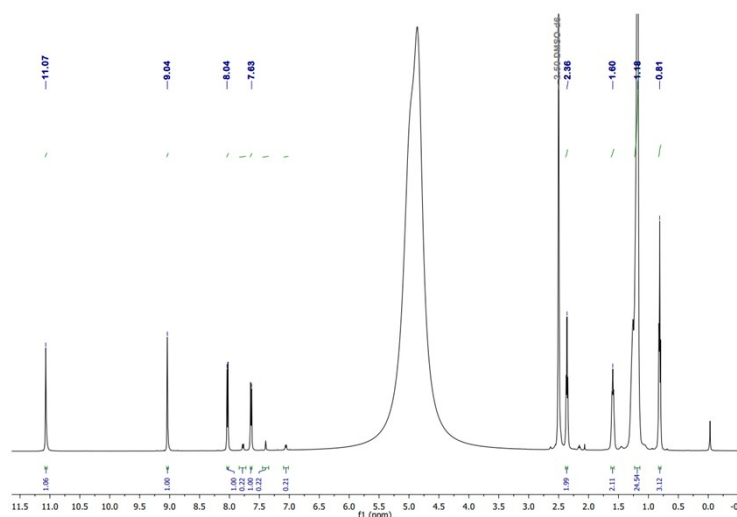

**Fig. S12.** The  $^1\text{H}$  NMR spectra of SH-UiO-66 in  $\text{DMSO-d}_6$  after digestion by HF.

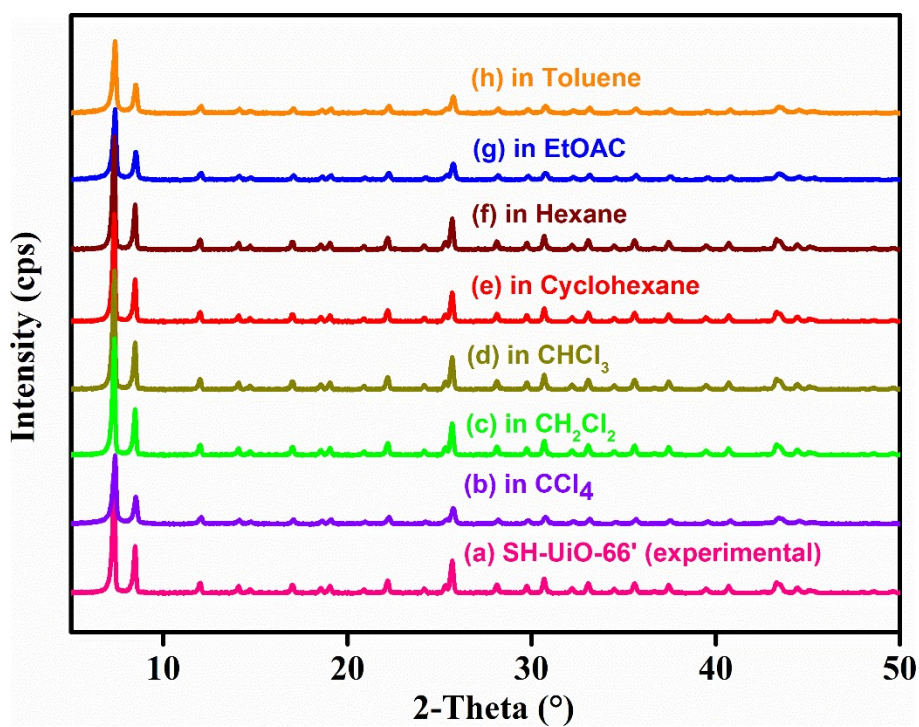

**Fig. S13.** PXRD patterns of (a) SH-UiO-66', SH-UiO-66' after stirring in (b)  $\text{CCl}_4$ , (c)  $\text{CH}_2\text{Cl}_2$ , (d)  $\text{CHCl}_3$ , (e) cyclohexane, (f) hexane, (g) EtOAc and (h) toluene.

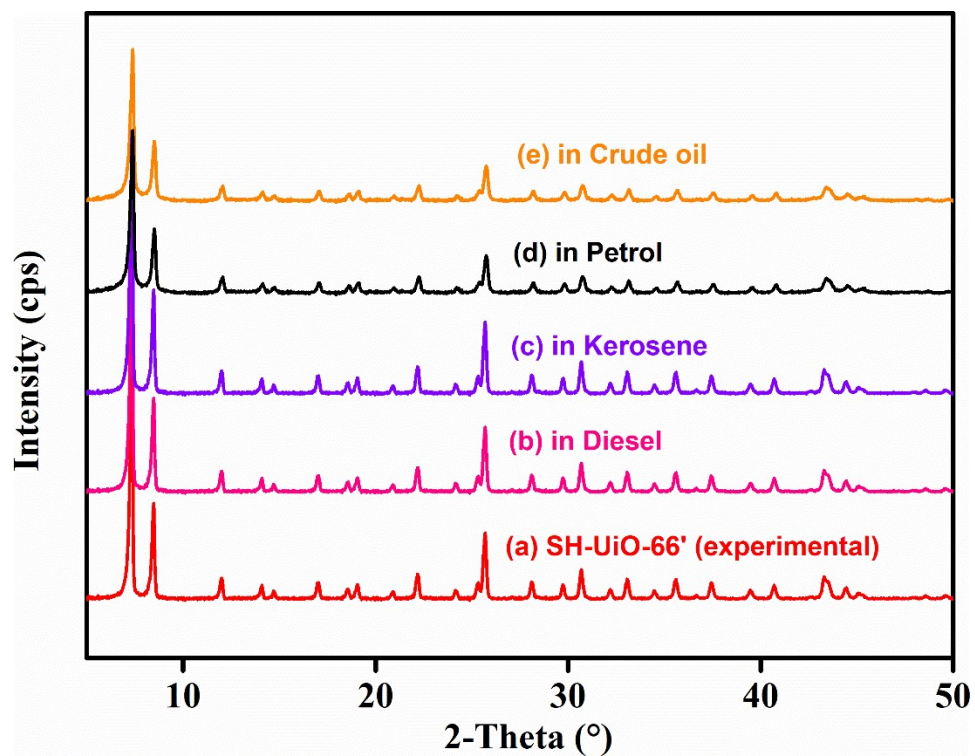

**Fig. S14.** PXRD patterns of (a) SH-UiO-66', SH-UiO-66' after stirring in (b) diesel, (c) kerosene, (d) petrol and (g) crude oil for 24 h.

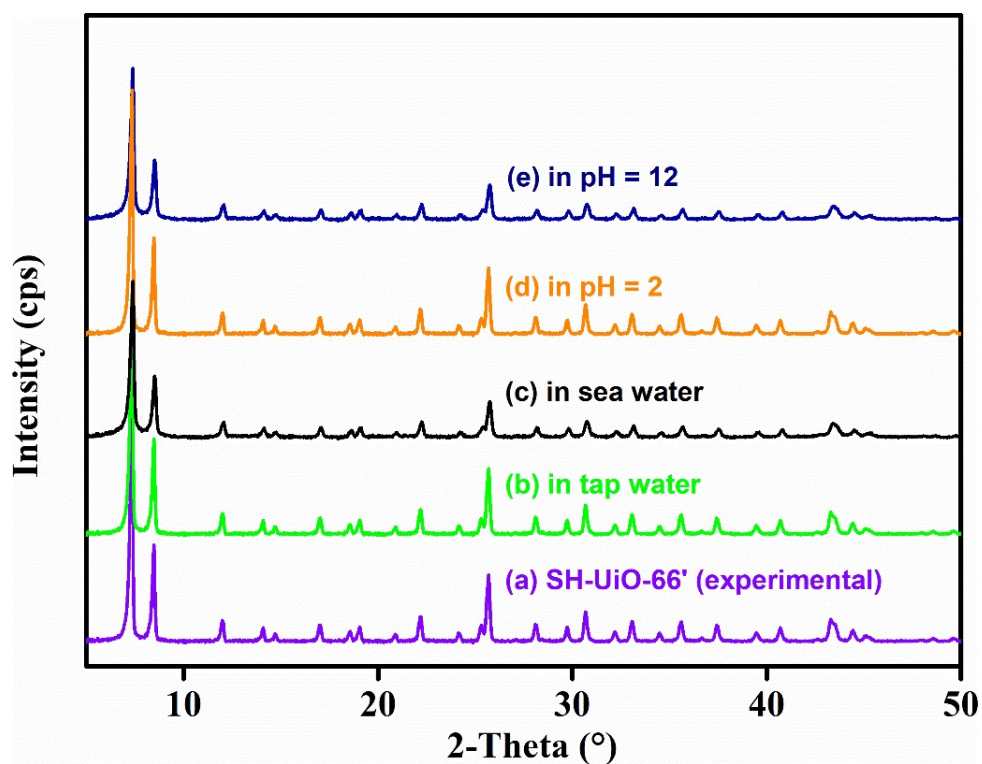

**Fig. S15.** PXRD patterns of (a) SH-UiO-66', SH-UiO-66' after stirring in (b) tap water, (c) sea water, (d) pH = 2 and (e) pH = 12 for 24 h.



**Table S2.** Water Contact angle (WCA) of **SH-UiO-66'** after treatment with different types of water and oil specimens.

| Liquids                         | Average WCA of <b>SH-UiO-66'</b> (°) |
|---------------------------------|--------------------------------------|
| Fresh <b>SH-UiO-66'</b>         | 168 ± 1                              |
| CCl <sub>4</sub>                | 169 ± 2                              |
| CHCl <sub>3</sub>               | 167 ± 2                              |
| CH <sub>2</sub> Cl <sub>2</sub> | 168 ± 1                              |
| Hexane                          | 167 ± 1                              |
| Cyclohexane                     | 168 ± 2                              |
| EtOAc                           | 166 ± 2                              |
| Toluene                         | 168 ± 3                              |
| kerosene                        | 167 ± 1                              |
| Diesel                          | 167 ± 2                              |
| Petrol                          | 166 ± 1                              |
| Crude oil                       | 165 ± 3                              |
| Tap water                       | 168 ± 1                              |
| pH = 2                          | 167 ± 1                              |
| pH = 12                         | 165 ± 2                              |
| Sea water                       | 166 ± 1                              |

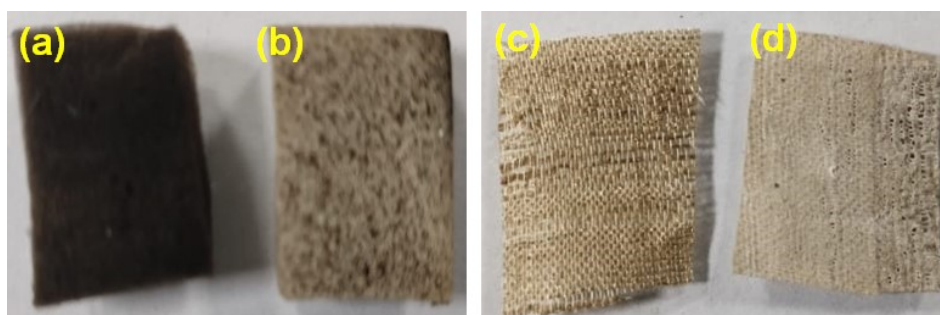

**Fig. S16.** Digital images of (a) polymer-coated sponge, (b) **SH-UiO-66'**@sponge composite, (c) polymer-coated silk membrane and (d) **SH-UiO-66'**@silk membrane.

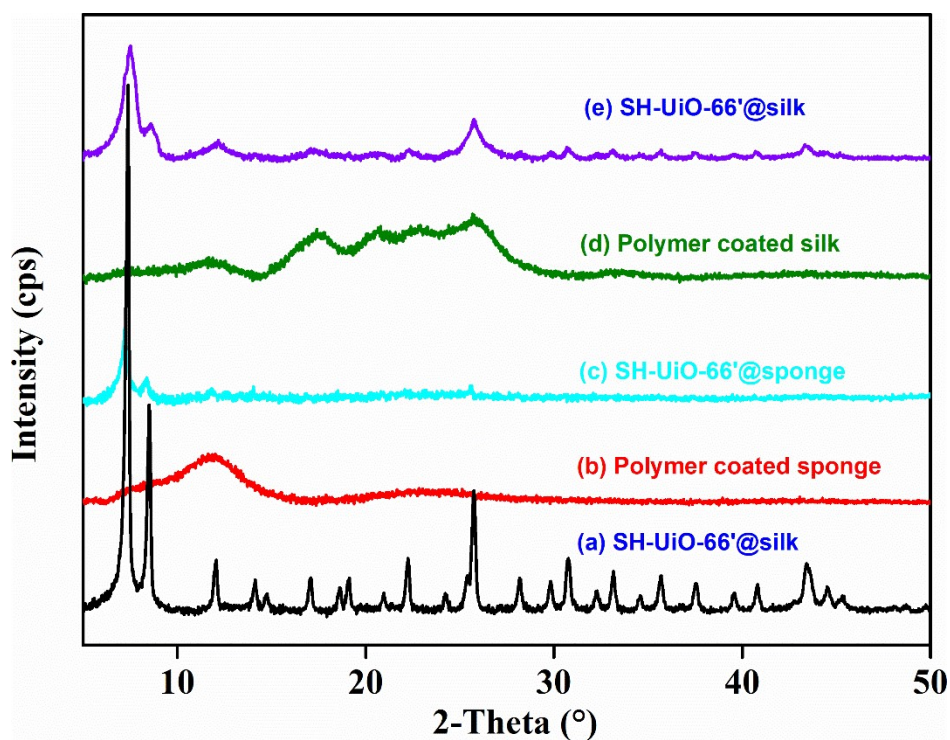

**Fig. S17.** PXRD patterns of (a) activated SH-UiO-66' (b) SH-UiO-66' polymer-coated sponge (c) SH-UiO-66'@sponge composite and (d) polymer-coated silk membrane and (e) SH-UiO-66'@silk membrane.

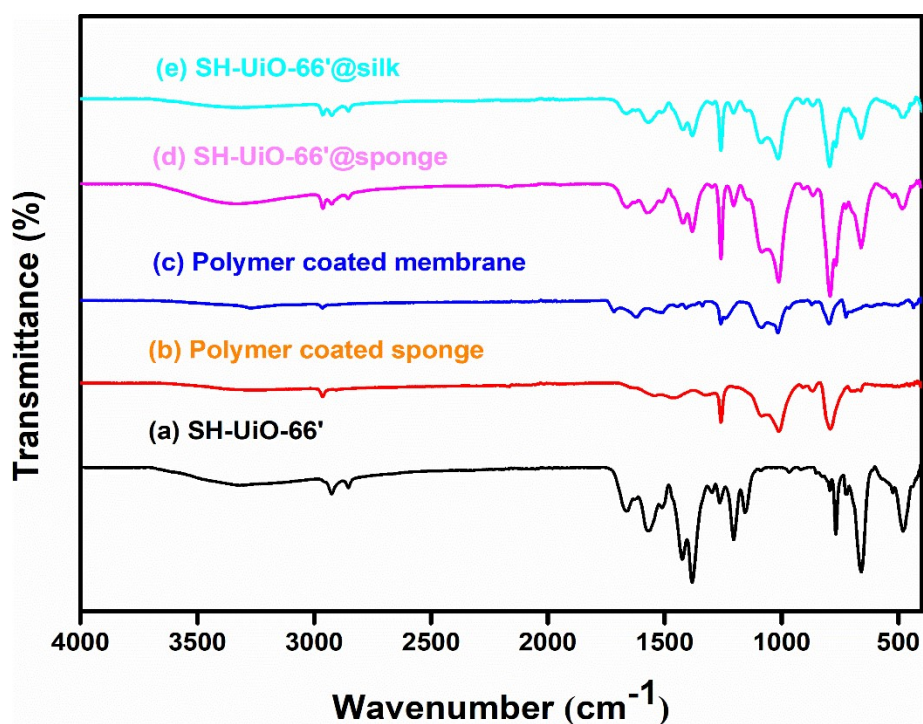

**Fig. S18.** ATR-IR spectra of (a) activated SH-UiO-66', (b) polymer-coated sponge, (c) polymer-coated membrane, (d) SH-UiO-66'@sponge composite and (e) SH-UiO-66'@silk membrane.

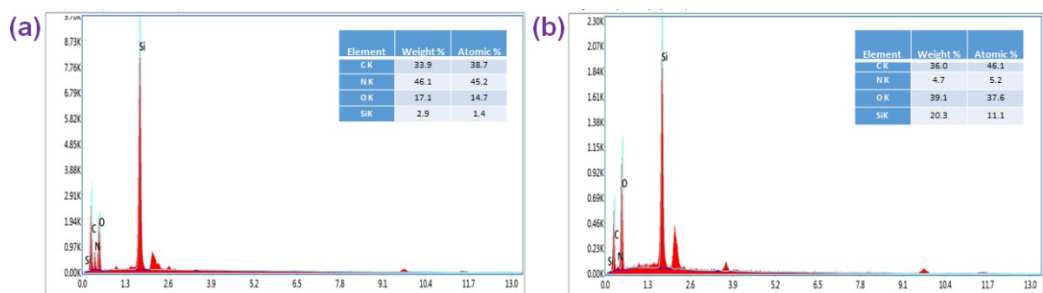

Fig. S19. EDX spectrum of (a) melamine sponge and (b) sheet of silk.

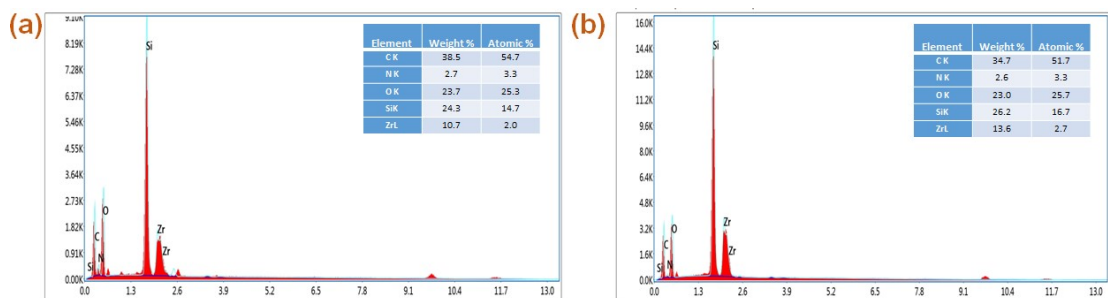

Fig. S20. EDX spectrum of (a) SH-UiO-66'@sponge composite and (b) SH-UiO-66'@silk membrane.

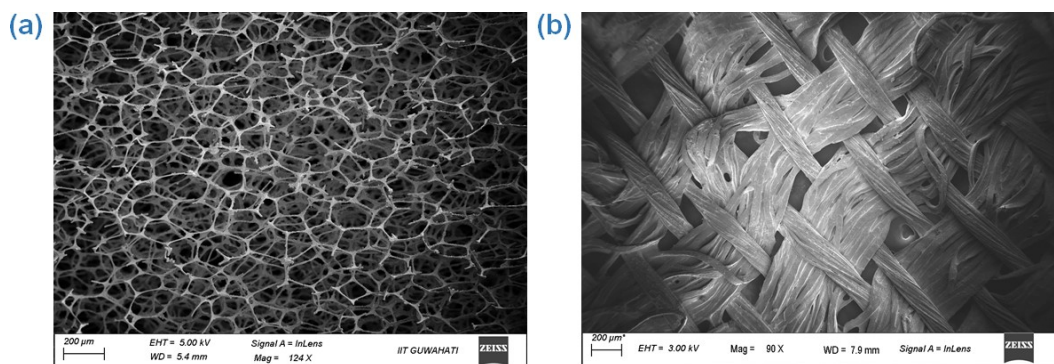

Fig. S21. High-resolution FE-SEM images of (a) melamine sponge and (b) silk sheet.

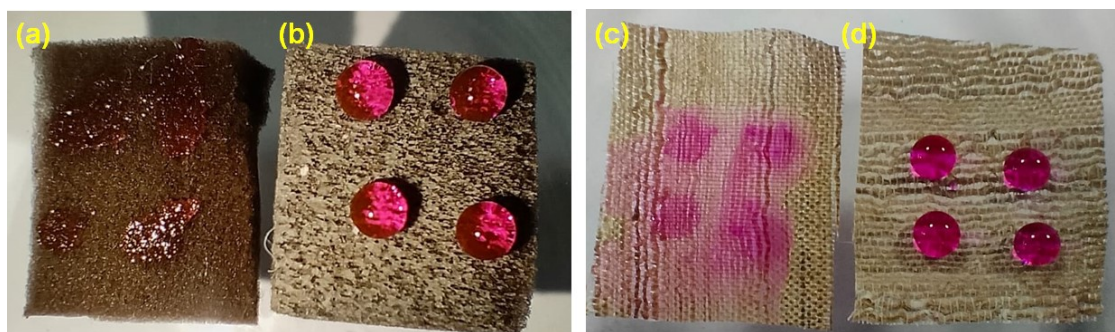

Fig. S22. Digital image of beaded water droplets on the surface of (a) polymer-coated sponge, (b) SH-UiO-66'@sponge composite, (c) polymer-coated membrane and (d) SH-UiO-66'@silk membrane.



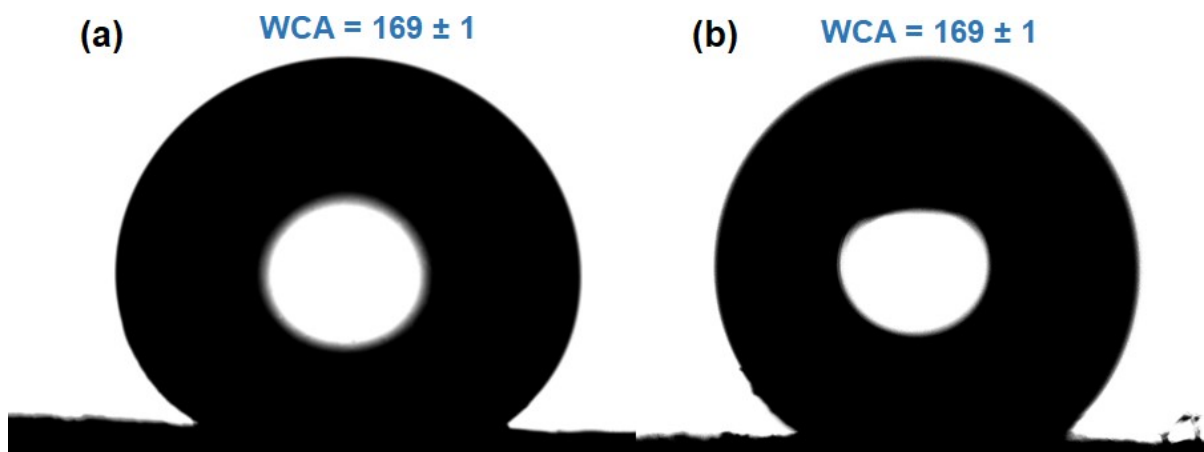

**Fig. S23.** The contact angle image of beaded water droplets on the surface of (a) SH-UiO-66', (b) SH-UiO-66'@sponge composite and (b) SH-UiO-66'@silk membrane.

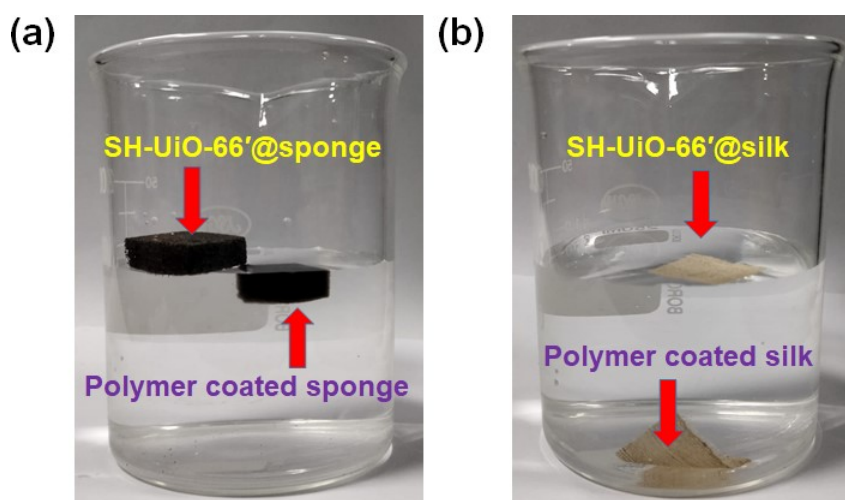

**Fig. S24.** (a) Digital images of floating SH-UiO-66'@sponge composite and immersion of polymer-coated melamine sponge. (b) Digital images of floating SH-UiO-66'@silk membrane on water and immersion of polymer-coated silk fabric in water.

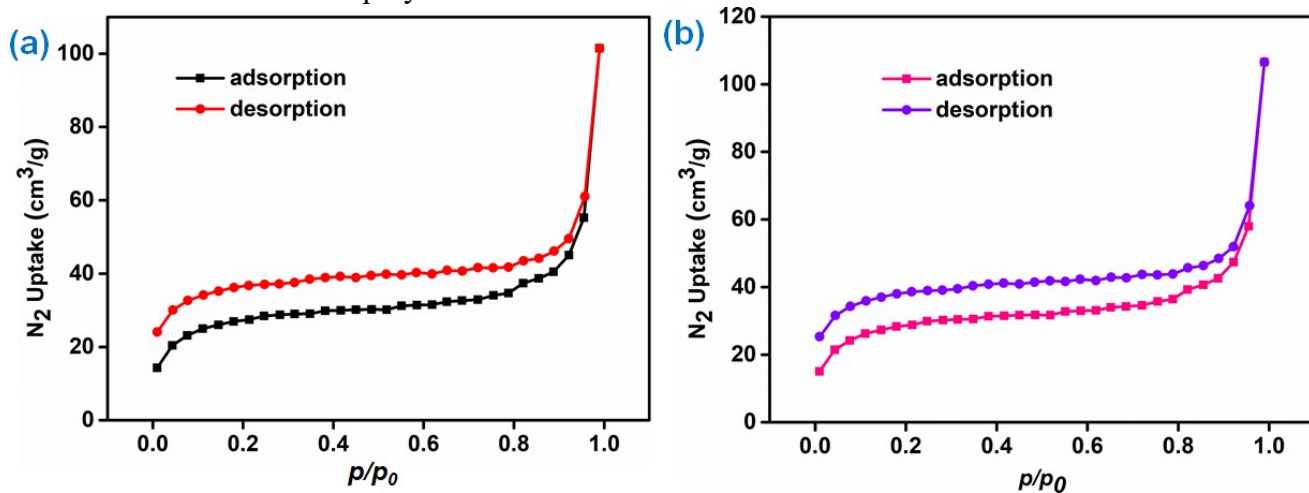



**Fig. S25.** Nitrogen adsorption and desorption isotherms of (a) SH-UiO-66' sponge and (b) SH-UiO-66'silk recorded at  $-196\text{ }^{\circ}\text{C}$ .

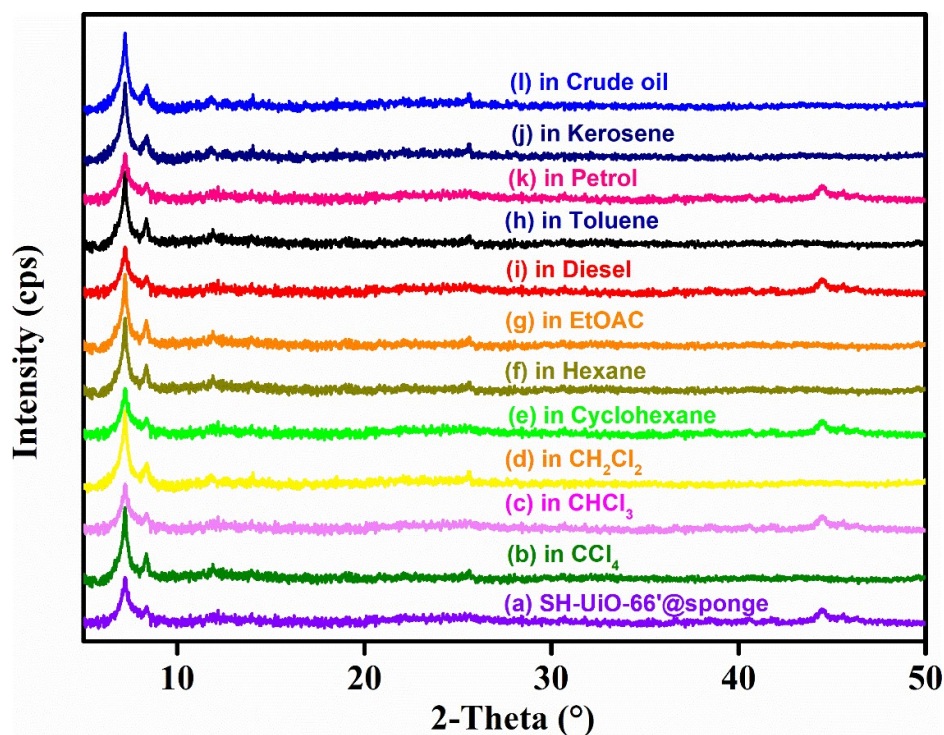

**Fig. S26.** PXRD patterns of (a) SH-UiO-66'@sponge composite after treatment with different types of oil specimens.

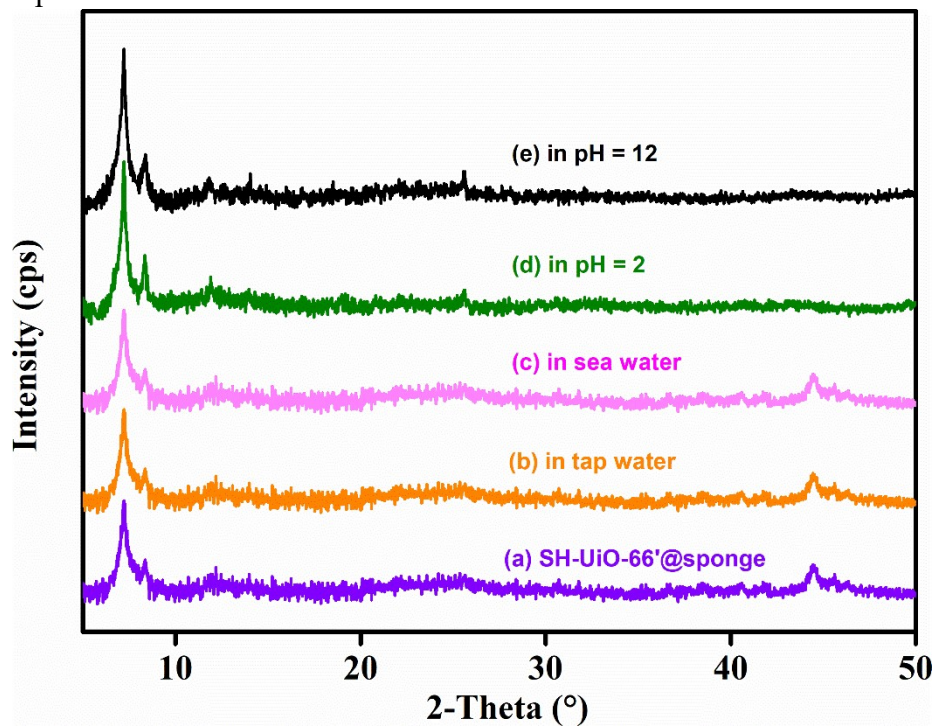

**Fig. S27.** PXRD patterns of (a) SH-UiO-66'@sponge composite after treatment with different types of water specimens.

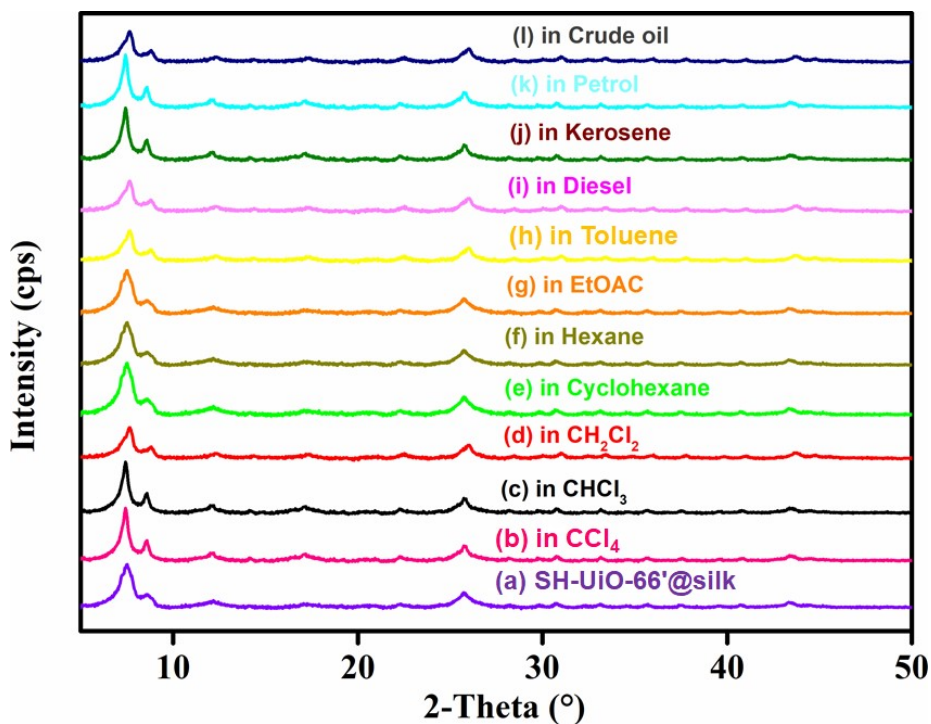

**Fig. S28.** PXRD patterns of (a) SH-UiO-66'@silk membrane after treatment with different types of oil specimens.

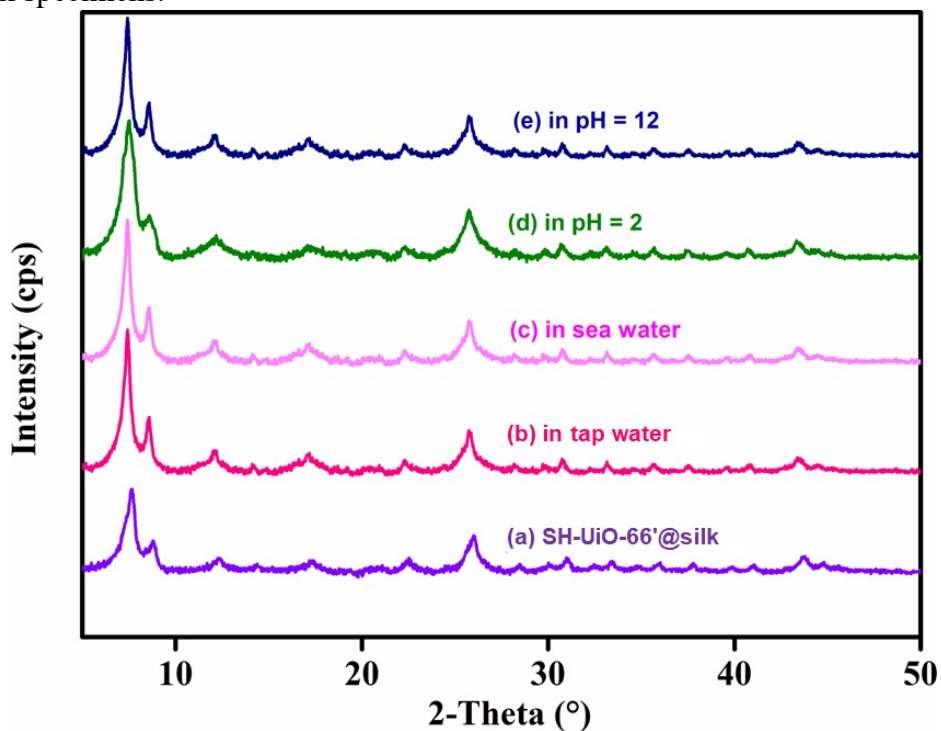

**Fig. S29.** PXRD patterns of (a) SH-UiO-66'@silk membrane after treatment with different types of water specimens.

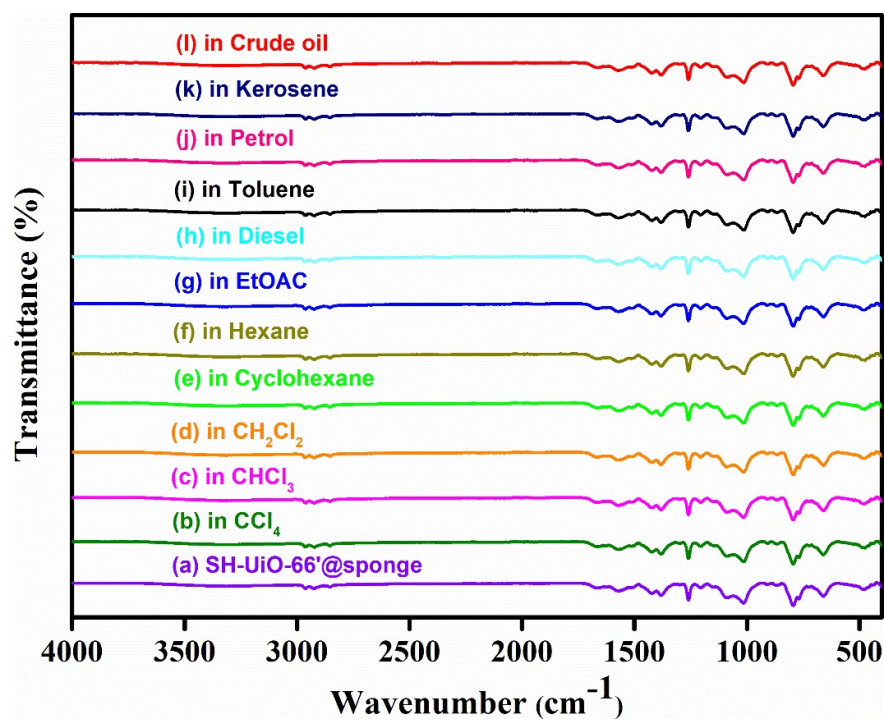

**Fig. S30.** ATR-IR spectra of (a) SH-UiO-66'@sponge composite after treatment with different types of oil specimens.

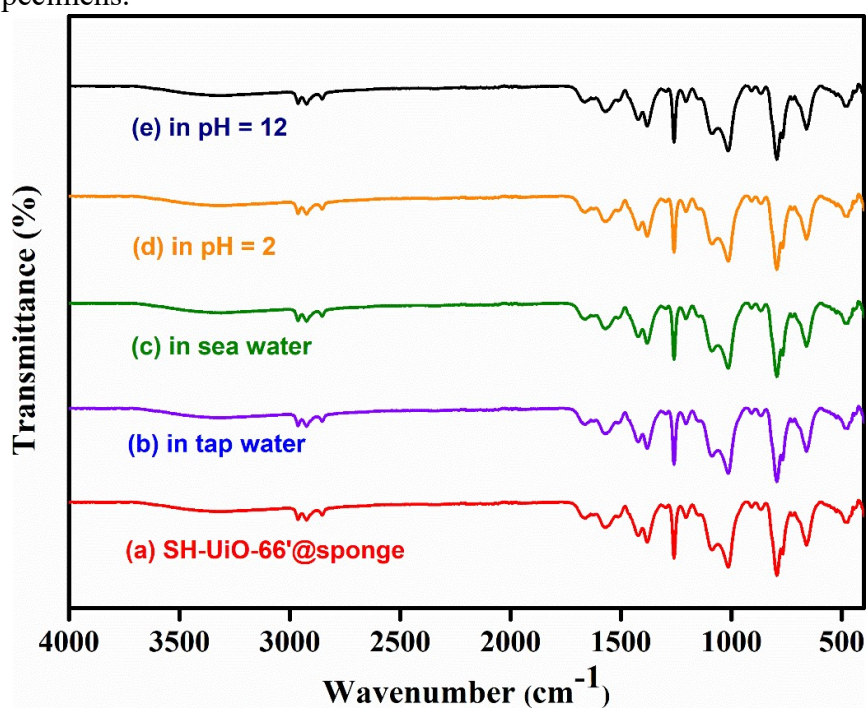

**Fig. S31.** ATR-IR spectra of (a) SH-UiO-66'@sponge composite after treatment with different types of water specimens.



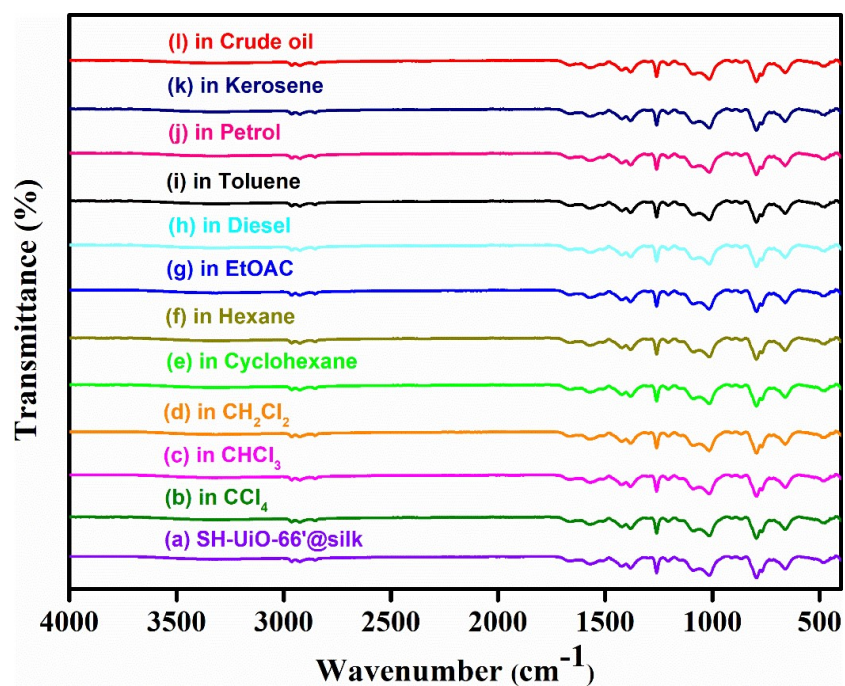

**Fig. S32.** ATR-IR spectra of (a) SH-UiO-66'@silk composite after treatment with different types of oil specimens.

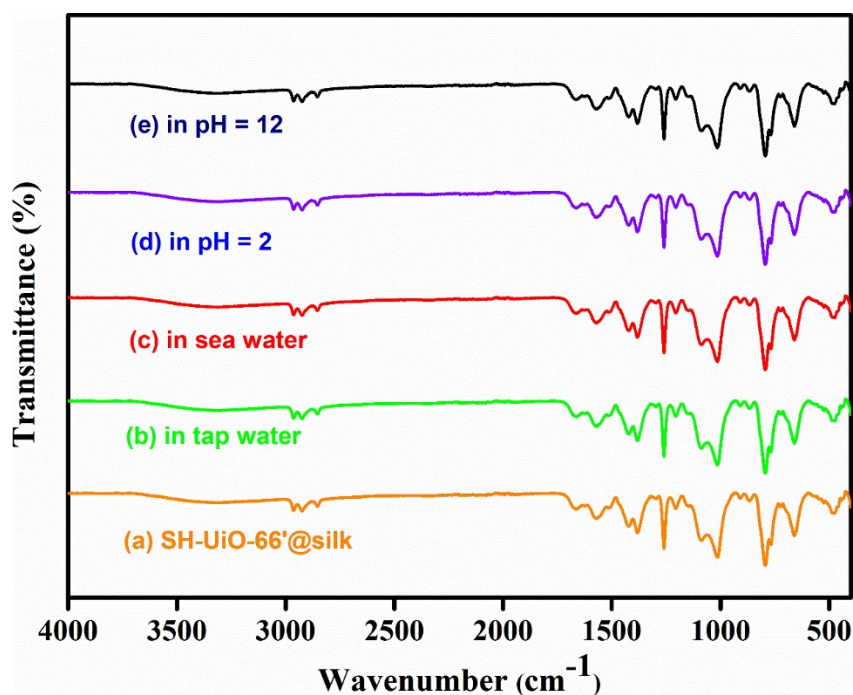

**Fig. S33.** ATR-IR spectra of (a) SH-UiO-66'@silk composite after treatment with different types of water specimens.

**Table S3.** Water Contact angle (WCA) of **SH-UiO-66'@sponge** and **SH-UiO-66'@silk** after treatment with different types of water and oil specimens.

| Liquids                                                       | Average WCA of <b>SH-UiO-66'@sponge</b> and <b>SH-UiO-66'@silk</b> (°) after stirring in different liquids |
|---------------------------------------------------------------|------------------------------------------------------------------------------------------------------------|
| Fresh <b>SH-UiO-66'@sponge</b> and <b>SH-UiO-66'@silk</b> (°) | 169 ± 1<br>and 169 ± 1                                                                                     |
| CCl <sub>4</sub>                                              | 167 ± 1<br>and 168 ± 2                                                                                     |
| CHCl <sub>3</sub>                                             | 169 ± 2<br>and 168 ± 1                                                                                     |
| CH <sub>2</sub> Cl <sub>2</sub>                               | 167 ± 2<br>and 168 ± 1                                                                                     |
| Hexane                                                        | 167 ± 2<br>and 167 ± 2                                                                                     |
| Cyclohexane                                                   | 166 ± 2<br>and 168 ± 1                                                                                     |
| EtOAc                                                         | 167 ± 1<br>and 168 ± 2                                                                                     |
| Toluene                                                       | 169 ± 2<br>and 167 ± 2                                                                                     |
| kerosene                                                      | 167 ± 2<br>and 167 ± 1                                                                                     |
| Diesel                                                        | 167 ± 2<br>and 168 ± 1                                                                                     |
| Petrol                                                        | 167 ± 1<br>and 169 ± 2                                                                                     |
| Crude oil                                                     | 169 ± 2<br>and 167 ± 2                                                                                     |
| Tap water                                                     | 169 ± 2                                                                                                    |

|           |                                |
|-----------|--------------------------------|
|           | and $169 \pm 1$                |
| pH = 2    | $166 \pm 1$<br>and $167 \pm 2$ |
| pH = 12   | $166 \pm 2$<br>and $165 \pm 3$ |
| Sea water | $165 \pm 2$<br>and $167 \pm 2$ |

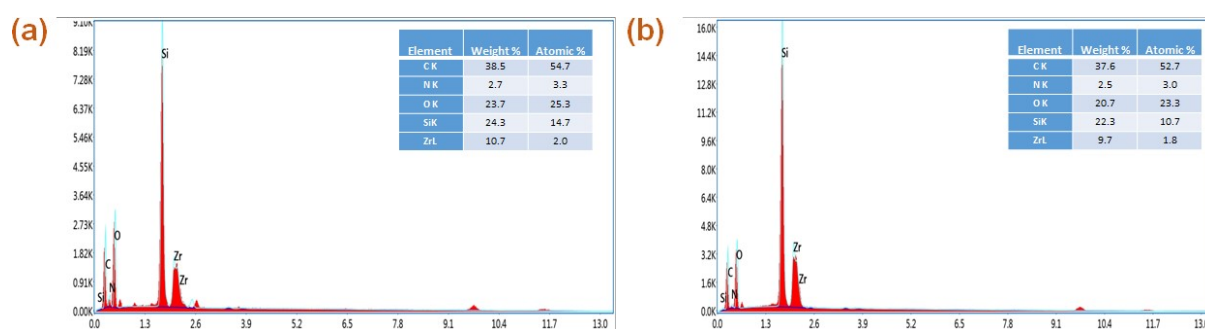

**Fig. S34.** EDX spectrum of (a) SH-UiO-66'@sponge composite and (b) SH-UiO-66'@silk after 70<sup>th</sup> and 60<sup>th</sup> cycle of oil-water separation experiments, respectively.

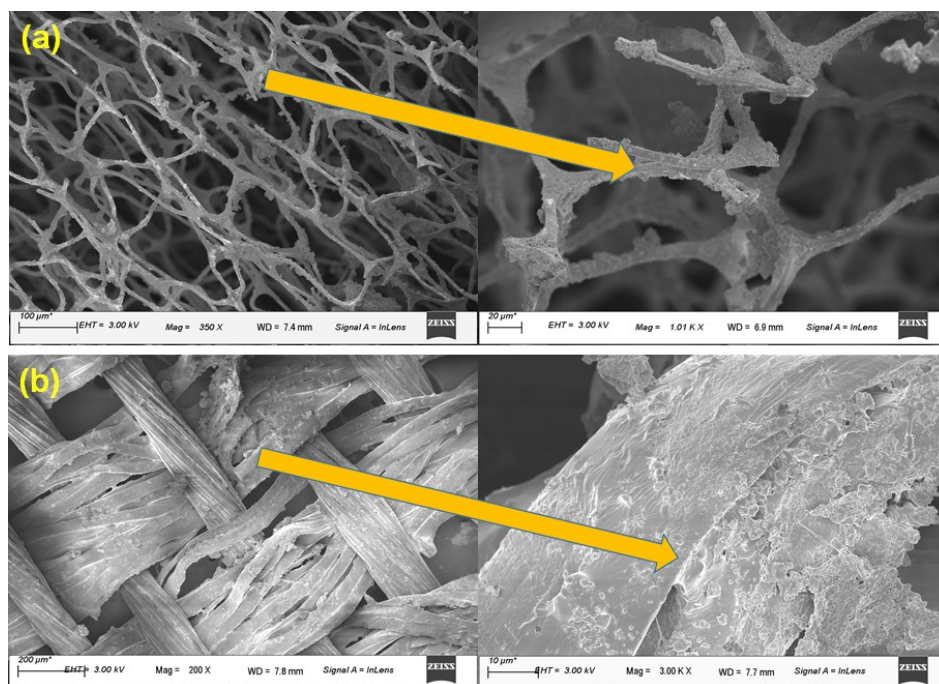

**Fig. S35.** High-resolution FE-SEM images of (a) SH-UiO-66'@sponge composite and (b) SH-UiO-66'@silk after 70<sup>th</sup> and 60<sup>th</sup> cycle of oil-water separation experiments, respectively.

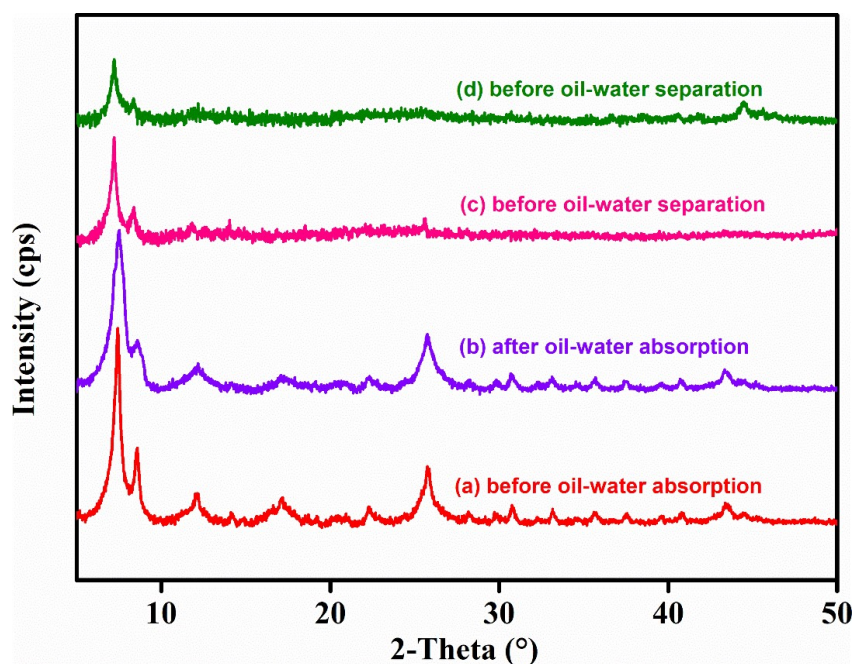

**Fig. S36.** PXRD patterns of SH-UiO-66'@sponge composite (a) before and (b) after oil absorption experiments and SH-UiO-66'@silk membrane (c) before and (d) after oil-water separation experiments.

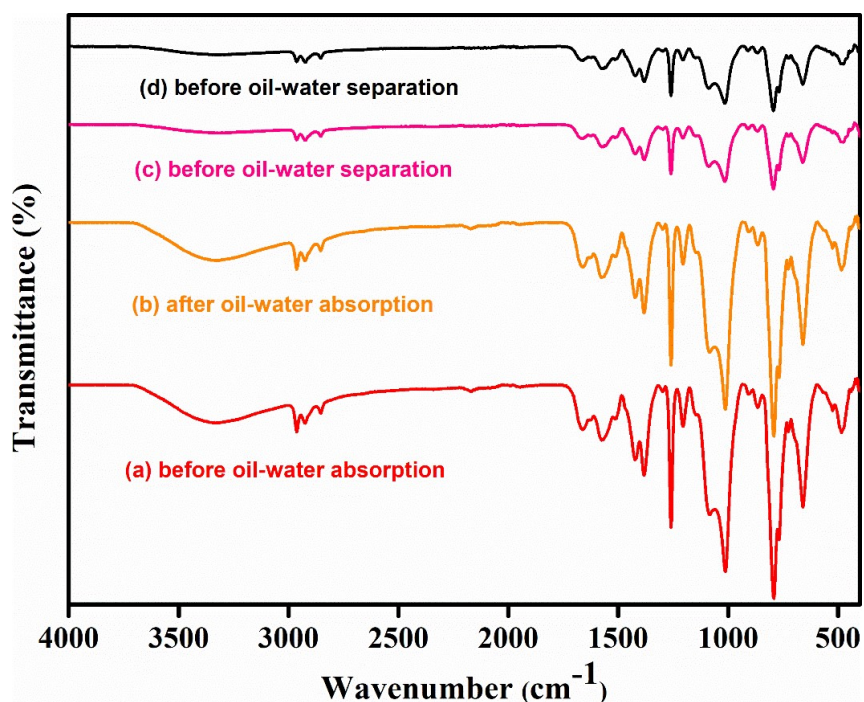

**Fig. S37.** ART-IR of SH-UiO-66'@sponge composite (a) before and (b) after oil absorption experiments and SH-UiO-66'@silk membrane (a) before and (d) after oil-water separation experiments.



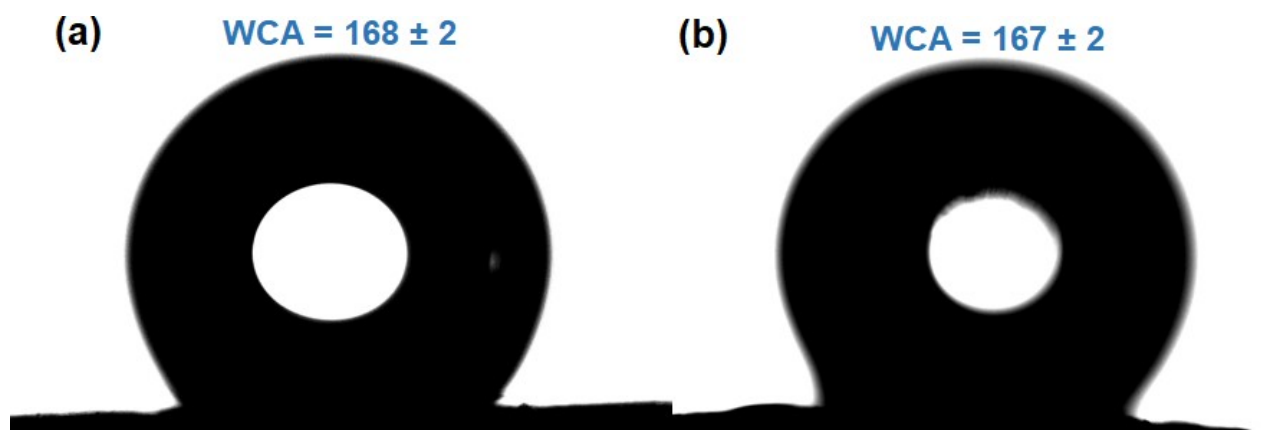

**Fig. S38.** WCA of SH-UiO-66'@sponge composite (a) after oil absorption experiments and SH-UiO-66'@silk membrane (b) after oil-water separation experiments.

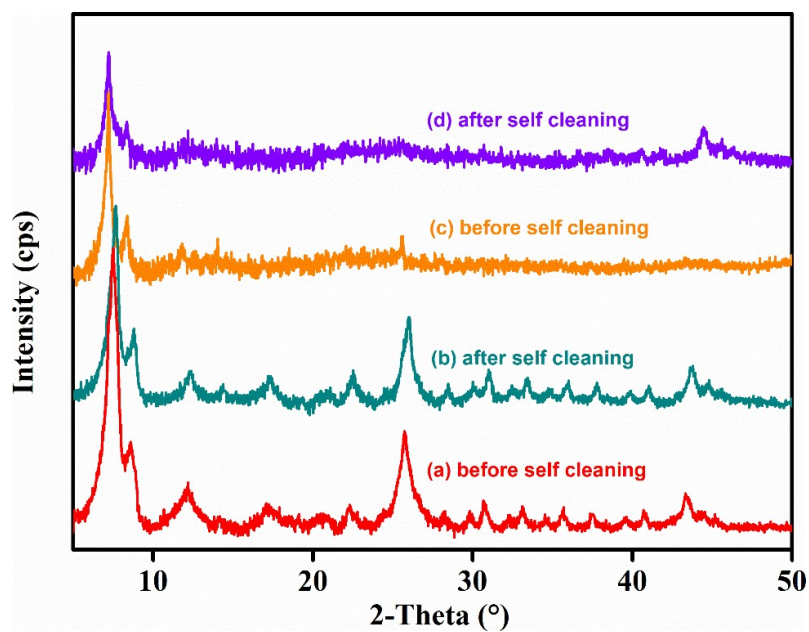

**Fig. S39.** PXRD patterns of SH-UiO-66'@sponge (a) before and (b) after self-cleaning and SH-UiO-66'@silk (c) before and (d) after self-cleaning.

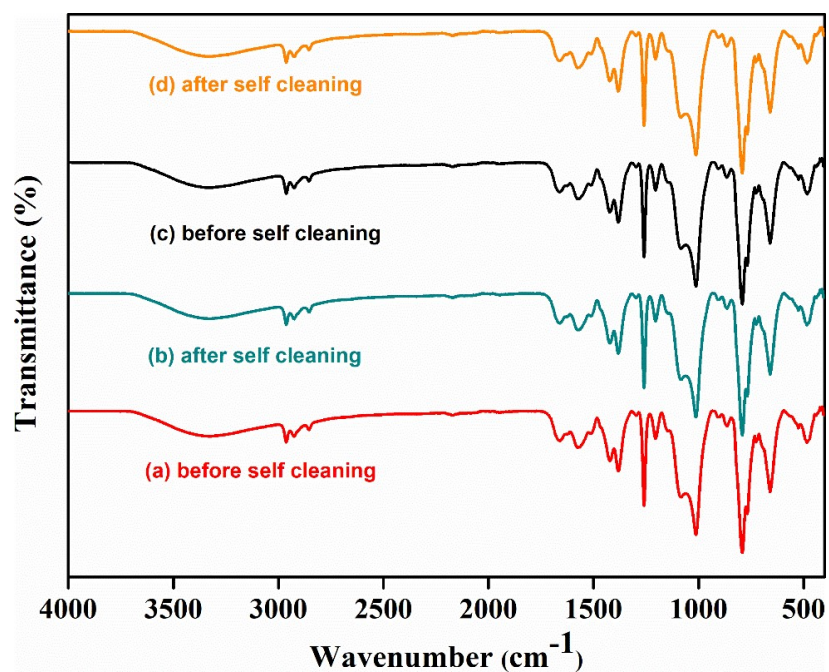

**Fig. S40.** ART-IR of SH-UiO-66'@sponge (a) before and (b) after self-cleaning and SH-UiO-66'@silk (c) before and (d) after self-cleaning.

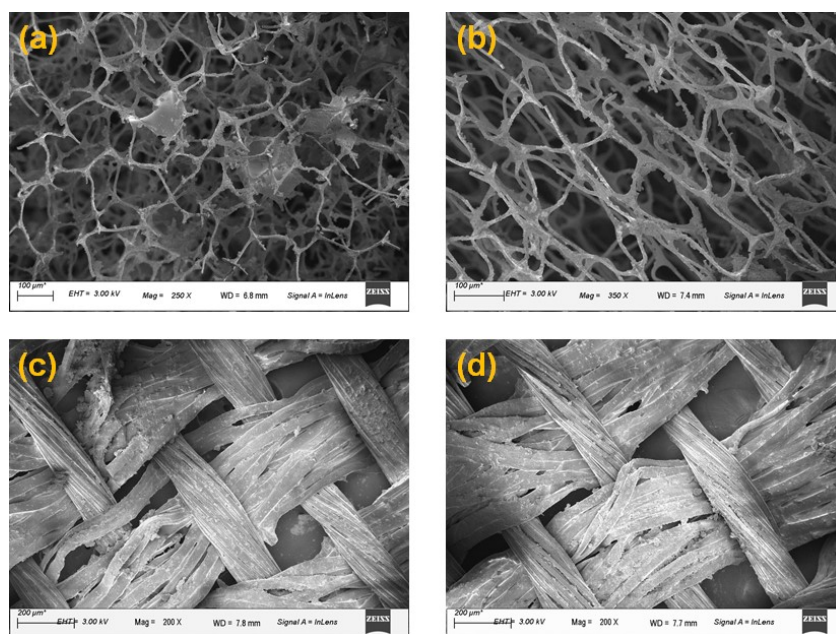

**Fig. S41.** High-resolution FE-SEM images of SH-UiO-66'@sponge (a) before and (b) after self-cleaning and SH-UiO-66'@silk (c) before and (d) after self-cleaning.

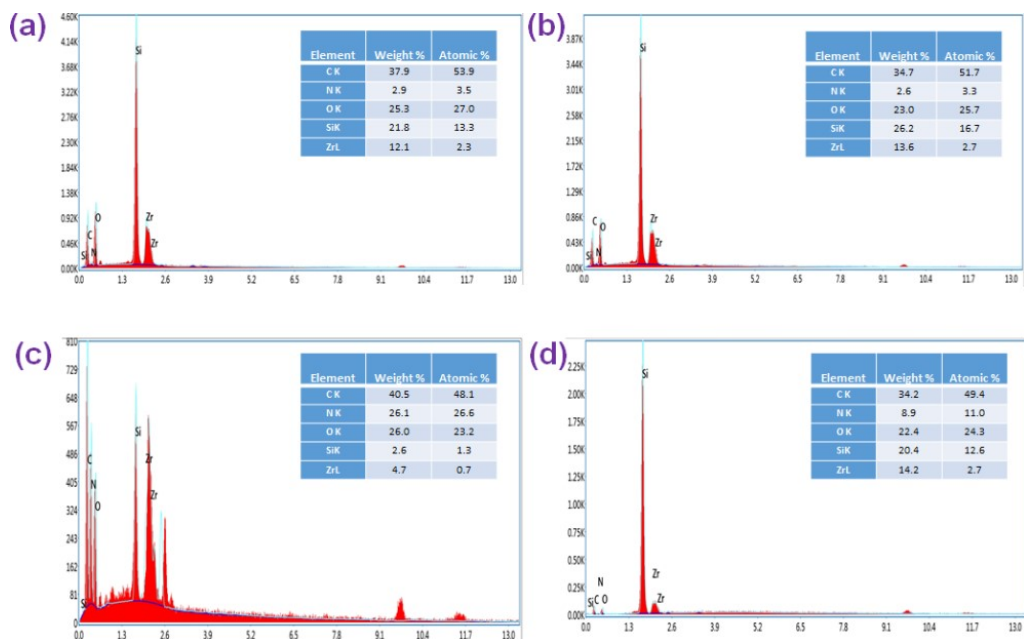

**Fig. S42.** EDX spectrum of SH-UiO-66'@sponge (a) before and (b) after self-cleaning and SH-UiO-66'@silk (c) before and (d) after self-cleaning.

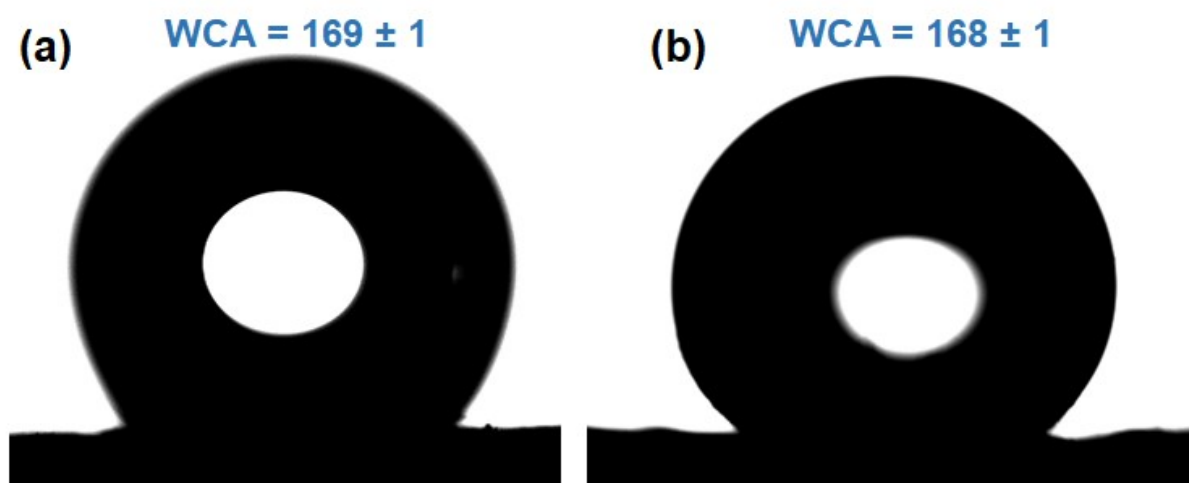

**Fig. S43.** WCA of SH-UiO-66'@sponge (a) after self-cleaning and SH-UiO-66'@silk (b) after self-cleaning.

**Table S4.** Comparison of important parameters of superhydrophobic absorbents or membranes materials for oil water separation.

| S. No. | Absorbents                    | Absorption substances                                         | Absorption capacity (g/g) | Oil-water separation efficiency (%) | Flux of Oil-water separation (Lm <sup>-2</sup> h <sup>-1</sup> ) | Ref.      |
|--------|-------------------------------|---------------------------------------------------------------|---------------------------|-------------------------------------|------------------------------------------------------------------|-----------|
| 1      | SH-UiO-66'@sponge and SH-UiO- | diesel oil, petrol oil, kerosene, crude oil, dichloromethane, | 43.8-97.2                 | ≥ 99                                | 58263-47416                                                      | this work |

|    |                                                           |                                                                                                                                       |            |       |    |    |
|----|-----------------------------------------------------------|---------------------------------------------------------------------------------------------------------------------------------------|------------|-------|----|----|
|    | 66'@membrane                                              | chloroform, carbon tetrachloride, ethyl acetate, hexane, toluene                                                                      |            |       |    |    |
| 2  | PDMS-TiO <sub>2</sub> -PU sponge                          | diesel oil, pump oil, silicone oil, edible oil, kerosene, dichloromethane, chloroform                                                 | 16.7-43.5  | NA    | NA | 1  |
| 3  | SH-UiO-66@CFs                                             | motor oil, silicone oil, gasoline, kerosene, toluene, hexane, ethyl acetate, carbon tetrachloride, chloroform, dichloromethane        | 27.1-49.2  | 95-98 | NA | 2  |
| 4  | superhydrophobic/superoleophilic sawdust                  | crude oil, n-hexane, gasoline, diesel oil, engine oil                                                                                 | 10.0-17.5  | NA    | NA | 3  |
| 5  | cotton fiber modified via the sol-gel method              | diesel oil, lubrication oil, crude oil, peanut oil                                                                                    | 25.6-57.0  | 98.5  | NA | 4  |
| 6  | modified jute fiber via the sol-gel method                | crude oil, diesel oil, lubrication oil, peanut oil                                                                                    | 7.4-10.2   | NA    | NA | 5  |
| 7  | mesoporous silica aerogel                                 | petrol oil, diesel oil, toluene                                                                                                       | 19.1-18.6  | NA    | NA | 6  |
| 8  | ultralight cellulose-based aerogel                        | pump oil, diesel oil, chloroform, dodecane, hexane, soybean oil, pump oil, diesel oil, motor oil, heptane, toluene, DMSO, isopropanol | 18.0-41.8  | NA    | NA | 7  |
| 9  | cellulose-based aerogel                                   | crude oil, diesel oil, lubrication oil, silicone oil, soybean oil, toluene, n-hexane, trichloromethane, acetone, ethanol              | 60.4-152.3 | NA    | NA | 8  |
| 10 | polystyrene branched 9-octadecenoic acid grafted graphene | hexane, heptane, nonane, decane, hexadecane                                                                                           | 11.0-27.0  | NA    | NA | 9  |
| 11 | MOF-PU sponge                                             | n-hexane, paraffin, ethanol, edible oil, DMF, carbon                                                                                  | 29.0-56.0  | >96   | NA | 10 |

|    |                                     |                                                                                                                                            |           |        |            |    |
|----|-------------------------------------|--------------------------------------------------------------------------------------------------------------------------------------------|-----------|--------|------------|----|
|    |                                     | tetrachloride                                                                                                                              |           |        |            |    |
| 12 | UiO-66-F4@rGO/MS                    | n-hexane, isooctane, dichloromethane, 1,3,5-trimethylbenzene, silicone oil, diesel oil, light diesel oil, crude oil                        | 26.0-61.0 | 99.73  | NA         | 11 |
| 13 | MOF@Rgo composites                  | chloroform, n-hexane, silicone oil, bump oil, bean oil, toluene, acetone, butanone                                                         | 14.0-37.0 | >98    | NA         | 12 |
| 14 | MOFs-copper foam                    | soybean oil, n-hexane, isooctane, gasoline, dichloromethane, chloroform                                                                    | 1.5-3.5   | >96    | NA         | 13 |
| 15 | FGO@MOG                             | crude oil, decane, heptane, hexane, octadecane, octane, petrolether, pentane, toluene, veg oil, carbon tetrachloride                       | 2.0-5.0   | NA     | NA         | 14 |
| 16 | Macroporous silicone sponges        | crude oil, sunflower oil, kerosene, diesel, alcohol, acetic acid, chloroform, acetone, diethyl ether, n-hexane, isooctane, dichloromethane | 9.7-27.0  | >99    | NA         | 15 |
| 17 | GO/PDA coated fabric                | formamide, engine oil, ethylene glycol, liquide paraffin, propylene carbonate, rapeseed oil                                                | NA        | >99.50 | 1452 - 308 | 16 |
| 18 | CBM-CuO-SA                          | n-hexane, toluene, trichloromethane                                                                                                        | NA        | >96    | 141        | 17 |
| 19 | PVDF membrane                       | water-in-petroleum ether, water-in-toluene, water-in-isooctane, and water-in-dichloromethane                                               | NA        | NA     | NA         | 18 |
| 20 | Cu(OH) <sub>2</sub> @ZIF-8 membrane | heptane, cychlohexane, toluene, trichloromethane, diesel, dichloromethane,                                                                 | NA        | >97    | 90 000     | 19 |

|    |                    | petroleum                                                                                          |             |     |           |    |
|----|--------------------|----------------------------------------------------------------------------------------------------|-------------|-----|-----------|----|
| 21 | UiO-66-NH-C18-PSM  | Diesel, hexane, ethyl acetate, acetone, toluene, decane, dichloromethane                           | 32.3 - 66.1 | >99 | NA        | 20 |
| 22 | SMIL-101(Cr)-PSM   | Petrol, chloroform, hexane, toluene                                                                | 1.18-2.81   | >99 | NA        | 21 |
| 23 | OctA/rGA composite | DCM, Chloroform, Toluene, Benzene, chloroform, dichloromethane, hexadecane, p-xylene, ethylbenzene | 4.70-16.12  | NA  | Very less | 22 |

## References:

- Shuai, Q.; Yang, X.; Luo, Y.; Tang, H.; Luo, X.; Tan, Y.; Ma, M., A superhydrophobic poly(dimethylsiloxane)-TiO<sub>2</sub> coated polyurethane sponge for selective absorption of oil from water. *Mater. Chem. Phys.* **2015**, *162*, 94-99.
- Dalapati, R.; Nandi, S.; Gogoi, C.; Shome, A.; Biswas, S., Metal-organic framework (MOF) derived recyclable, superhydrophobic composite of cotton fabrics for the facile removal of oil spills. *ACS Appl. Mater. Interfaces* **2021**, *13*, 8563-8573.
- Zang, D.; Liu, F.; Zhang, M.; Gao, Z.; Wang, C., Novel superhydrophobic and superoleophilic sawdust as a selective oil sorbent for oil spill cleanup. *Chem. Eng. Res. Des.* **2015**, *102*, 34-41.
- Lv, N.; Wang, X.; Peng, S.; Luo, L.; Zhou, R., Superhydrophobic/superoleophilic cotton-oil absorbent: preparation and its application in oil/ water separation. *RSC Adv.* **2018**, *8*, 30257-30264.
- Lv, N.; Wang, X.; Peng, S.; Zhang, H.; Luo, L., Study of the kinetics and equilibrium of the adsorption of oils onto hydrophobic jute fiber modified via the sol-gel method. *Int. J. Environ. Res. Public Health* **2018**, *15*, 969.
- Zhang, C.; Dai, C.; Zhang, H.; Peng, S.; Wei, X.; Hu, Y., Regeneration of mesoporous silica aerogel for hydrocarbon adsorption and recovery. *Mar. Pollut. Bull.* **2017**, *122*, 129-138.
- Zhang, H.; Li, Y.; Xu, Y.; Lu, Z.; Chen, L.; Huang, L.; Fan, M., Versatile fabrication of a superhydrophobic and ultralight cellulose-based aerogel for oil spillage clean-up. *Phys. Chem. Chem. Phys.* **2016**, *18*, 28297-28306.
- Yin, T.; Zhang, X.; Liu, X.; Wang, C., Resource recovery of Eichhornia crassipes as oil superabsorbent. *Mar. Pollut. Bull.* **2017**, *118*, 267-274.
- Alghunaimi, F. I.; Alsaed, D. J.; Harith, A. M.; Saleh, T. A., Synthesis of 9-octadecenoic acid grafted graphene modified with polystyrene for efficient light oil removal from water. *J. Clean. Prod.* **2019**, *233*, 946-953.
- He, Z.; Wu, H.; Shi, Z.; Duan, X.; Ma, S.; Chen, J.; Kong, Z.; Chen, A.; Sun, Y.; Liu, X., Mussel-inspired durable superhydrophobic/superoleophilic MOF-PU sponge with high chemical stability, efficient oil/water separation and excellent anti-icing properties. *Colloids Surf. A Physicochem. Eng. Asp.* **2022**, *648*, 129142.
- Zhan, Y.; He, S.; Hu, J.; Zhao, S.; Zeng, G.; Zhou, M.; Zhang, G.; Sengupta, A., Robust super-hydrophobic/super-oleophilic sandwich-like UiO-66-F4@rGO composites for efficient and multitasking oil/water separation applications. *J. Hazard. Mater.* **2020**, *388*, 121752.



12. Gu, J.; Fan, H.; Li, C.; Caro, J.; Meng, H., Robust superhydrophobic/superoleophilic wrinkled microspherical MOF@rGO composites for efficient oil-water separation. *Angew. Chem. Int. Ed.* **2019**, *58*, 5297-5301.
13. Du, J.; Zhang, C.; Pu, H.; Li, Y.; Jin, S.; Tan, L.; Zhou, C.; Dong, L., HKUST-1 MOFs decorated 3D copper foam with superhydrophobicity/superoleophilicity for durable oil/water separation. *Colloids Surf. A Physicochem. Eng. Asp.* **2019**, *573*, 222-229.
14. Jayaramulu, K.; Geyer, F.; Petr, M.; Zboril, R.; Vollmer, D.; Fische, R. A., Shape controlled hierarchical porous hydrophobic/oleophilic metal-organic nanofibrous gel composites for oil adsorption. *Adv. Mater.* **2017**, *29*, 1605307.
15. Cao, J.; Wang, D.; An, P.; Zhang, J.; Feng, S., Highly compression-tolerant and durably hydrophobic macroporous silicone sponges synthesized by a one-pot click reaction for rapid oil/water separation. *J. Mater. Chem. A* **2018**, *6*, 18025-18030.
16. Zhu, X.; Gao, Z.; Li, F.; Miao, G.; Xu, T.; Miao, X.; Song, Y.; Li, X.; Ren, G., Superhydrophobic graphene oxide/polydopamine coating under liquid system for liquid/liquid separation, dye removal, and anti-corrosion. *Carbon* **2022**, *190*, 329-336.
17. Yin, Z.; Yuan, F.; Xue, M.; Xue, Y.; Xie, Y.; Ou, J.; Luo, Y.; Hong, Z.; Xie, C., A multifunctional and environmentally safe superhydrophobic membrane with superior oil/water separation, photocatalytic degradation and anti-biofouling performance. *J. Colloid Interface Sci.* **2022**, *611*, 93-104.
18. W. Zhang; Shi, Z.; Zhang, F.; Liu, X.; Jin, J.; Jiang, L., Superhydrophobic and superoleophilic PVDF membranes for effective separation of water-in-oil emulsions with high flux. *Adv. Mater.* **2013**, *25*, 2071-2076.
19. Li, Q.; Deng, W.; Li, C.; Sun, Q.; F. Huang; Zhao, Y.; Li, S., High-flux oil/water separation with interfacial capillary effect in switchable superwetting Cu(OH)<sub>2</sub>@ZIF-8 nanowire membranes. *ACS Appl. Mater. Interfaces* **2018**, *10*, 40265-40273.
20. Shi, M.; Huang, R.; Qi, W.; Su, R.; He, Z., Synthesis of superhydrophobic and high stable Zr-MOFs for oil-water separation. *Colloids Surf. A Physicochem. Eng.* **2020**, *602*, 125102.
21. Gao, M.; Zhao, S.; Chen, Z.; Liu, L.; Han, Z., Superhydrophobic/superoleophilic MOF composites for oil-water separation. *Inorg. Chem.* **2019**, *58*, 2261-2264.
22. Kang, D. W.; Kang, M.; Choe, J. H.; Kim, H.; Kim, D. W.; Hong, C. S., Fine-tuning of wettability in a single metal-organic framework via postcoordination modification and its reduced graphene oxide aerogel for oil-water separation. *S. Eom. Chem. Sci.* **2019**, *10*, 2663-2669.
